# Supplementary material for: Machine Learning for Predicting Neutron Effective Dose
Source: Preprints.org preprint supplement (doi:10.20944/preprints202404.1821.v1), 2024-04-28
Supplement: Supplementary file 1 [file Supplementary Materials A.xlsx]

## Sheet: Sheet1
Energy(Mev)	Organ	Organ mass (g)	Density	AP	PA	LAT		MIRD data
1e-09	Bladder	258.6	1.02	1.28	0.5	0.18
1e-08	Bladder	258.6	1.02	1.63	0.65	0.24
2.5e-08	Bladder	258.6	1.02	1.94	0.77	0.28
1e-07	Bladder	258.6	1.02	2.65	1.02	0.36
2e-07	Bladder	258.6	1.02	3.03	1.14	0.4
5e-07	Bladder	258.6	1.02	3.51	1.31	0.46
1e-06	Bladder	258.6	1.02	3.84	1.42	0.5
2e-06	Bladder	258.6	1.02	4.06	1.52	0.54
5e-06	Bladder	258.6	1.02	4.24	1.63	0.59
1e-05	Bladder	258.6	1.02	4.28	1.69	0.61
2e-05	Bladder	258.6	1.02	4.27	1.73	0.63
5e-05	Bladder	258.6	1.02	4.19	1.75	0.63
0.0001	Bladder	258.6	1.02	4.11	1.76	0.63
0.0002	Bladder	258.6	1.02	4.05	1.74	0.62
0.0005	Bladder	258.6	1.02	3.99	1.71	0.61
0.001	Bladder	258.6	1.02	3.97	1.69	0.6
0.002	Bladder	258.6	1.02	3.98	1.69	0.58
0.005	Bladder	258.6	1.02	4.01	1.69	0.58
0.01	Bladder	258.6	1.02	3.97	1.71	0.58
0.02	Bladder	258.6	1.02	4	1.72	0.6
0.03	Bladder	258.6	1.02	4.01	1.74	0.61
0.05	Bladder	258.6	1.02	4.08	1.79	0.64
0.07	Bladder	258.6	1.02	4.22	1.83	0.67
0.1	Bladder	258.6	1.02	4.51	1.9	0.71
0.15	Bladder	258.6	1.02	5.18	1.96	0.75
0.2	Bladder	258.6	1.02	5.87	2.03	0.8
0.3	Bladder	258.6	1.02	7.24	2.2	0.89
0.5	Bladder	258.6	1.02	9.84	2.57	1.09
0.7	Bladder	258.6	1.02	12.3	2.91	1.25
0.9	Bladder	258.6	1.02	14.7	3.36	1.49
1	Bladder	258.6	1.02	15.8	3.63	1.64
1.2	Bladder	258.6	1.02	18	4.42	2.1
2	Bladder	258.6	1.02	25.8	8.19	4.79
3	Bladder	258.6	1.02	34	13.4	8.48
4	Bladder	258.6	1.02	40.5	18.3	12
5	Bladder	258.6	1.02	46	22.5	15.3
6	Bladder	258.6	1.02	50.6	26.4	18.4
7	Bladder	258.6	1.02	54.6	30.1	21.3
8	Bladder	258.6	1.02	58	33.7	24
9	Bladder	258.6	1.02	61.1	37	26.6
10	Bladder	258.6	1.02	63.7	40.2	29
12	Bladder	258.6	1.02	68.2	45.7	33.3
14	Bladder	258.6	1.02	71.7	50.3	37
15	Bladder	258.6	1.02	73.2	52.2	38.7
16	Bladder	258.6	1.02	74.5	53.8	40.3
18	Bladder	258.6	1.02	76.8	56.7	43.3
20	Bladder	258.6	1.02	78.7	59.1	46
1e-09	RBM	1100	0.98	0.61	1.14	0.37
1e-08	RBM	1100	0.98	0.76	1.41	0.48
2.5e-08	RBM	1100	0.98	0.91	1.61	0.56
1e-07	RBM	1100	0.98	1.21	2.07	0.71
2e-07	RBM	1100	0.98	1.38	2.31	0.8
5e-07	RBM	1100	0.98	1.59	2.62	0.91
1e-06	RBM	1100	0.98	1.72	2.82	0.99
2e-06	RBM	1100	0.98	1.83	2.99	1.05
5e-06	RBM	1100	0.98	1.93	3.12	1.1
1e-05	RBM	1100	0.98	1.97	3.1	1.12
2e-05	RBM	1100	0.98	1.98	3.16	1.13
5e-05	RBM	1100	0.98	1.96	3.11	1.12
0.0001	RBM	1100	0.98	1.93	3.04	1.11
0.0002	RBM	1100	0.98	1.89	2.97	1.08
0.0005	RBM	1100	0.98	1.83	2.89	1.05
0.001	RBM	1100	0.98	1.78	2.84	1.03
0.002	RBM	1100	0.98	1.75	2.81	1.01
0.005	RBM	1100	0.98	1.76	2.81	1.01
0.01	RBM	1100	0.98	1.81	2.87	1.03
0.02	RBM	1100	0.98	1.91	3.01	1.09
0.03	RBM	1100	0.98	2	3.13	1.15
0.05	RBM	1100	0.98	2.15	3.37	1.25
0.07	RBM	1100	0.98	2.29	3.63	1.35
0.1	RBM	1100	0.98	2.64	4.03	1.49
0.15	RBM	1100	0.98	2.71	4.65	1.71
0.2	RBM	1100	0.98	2.92	5.26	1.92
0.3	RBM	1100	0.98	3.28	6.41	2.32
0.5	RBM	1100	0.98	4.08	8.56	3.11
0.7	RBM	1100	0.98	5.09	10.6	3.9
0.9	RBM	1100	0.98	6.21	12.6	4.71
1	RBM	1100	0.98	6.76	13.5	5.12
1.2	RBM	1100	0.98	7.99	15.5	6.07
2	RBM	1100	0.98	12.8	22.5	9.99
3	RBM	1100	0.98	18.3	29.7	14.3
4	RBM	1100	0.98	23.3	35.2	17.8
5	RBM	1100	0.98	27.4	39.3	20.9
6	RBM	1100	0.98	31.1	42.6	23.6
7	RBM	1100	0.98	34.5	45.5	26
8	RBM	1100	0.98	37.5	48.1	28.2
9	RBM	1100	0.98	40.2	50.5	30.2
10	RBM	1100	0.98	42.6	52.7	32.1
12	RBM	1100	0.98	46.6	65.6	35.5
14	RBM	1100	0.98	49.9	59.6	38.6
15	RBM	1100	0.98	51.2	60.9	40
16	RBM	1100	0.98	52.4	62	41.4
18	RBM	1100	0.98	54.5	63.7	44
20	RBM	1100	0.98	56.2	65.1	46.4
1e-09	Bone	4740	1.9	0.77	0.94	0.47
1e-08	Bone	4740	1.9	0.95	1.15	0.59
2.5e-08	Bone	4740	1.9	1.1	1.34	0.69
1e-07	Bone	4740	1.9	1.43	1.69	0.88
2e-07	Bone	4740	1.9	1.6	1.88	0.98
5e-07	Bone	4740	1.9	1.8	2.12	1.09
1e-06	Bone	4740	1.9	1.93	2.29	1.17
2e-06	Bone	4740	1.9	2.03	2.4	1.22
5e-06	Bone	4740	1.9	2.09	2.48	1.26
1e-05	Bone	4740	1.9	2.1	2.5	1.27
2e-05	Bone	4740	1.9	2.08	2.5	1.26
5e-05	Bone	4740	1.9	2.03	2.47	1.23
0.0001	Bone	4740	1.9	1.98	2.43	1.2
0.0002	Bone	4740	1.9	1.93	2.39	1.17
0.0005	Bone	4740	1.9	1.88	2.33	1.13
0.001	Bone	4740	1.9	1.86	2.29	1.1
0.002	Bone	4740	1.9	1.86	2.24	1.09
0.005	Bone	4740	1.9	1.88	2.22	1.09
0.01	Bone	4740	1.9	1.91	2.26	1.12
0.02	Bone	4740	1.9	1.97	2.36	1.17
0.03	Bone	4740	1.9	2.02	2.45	1.22
0.05	Bone	4740	1.9	2.13	2.65	1.34
0.07	Bone	4740	1.9	2.27	2.85	1.46
0.1	Bone	4740	1.9	2.51	3.16	1.66
0.15	Bone	4740	1.9	2.92	3.65	2
0.2	Bone	4740	1.9	3.32	4.12	2.33
0.3	Bone	4740	1.9	4.08	5.01	2.95
0.5	Bone	4740	1.9	5.48	6.66	4.08
0.7	Bone	4740	1.9	6.79	8.28	5.14
0.9	Bone	4740	1.9	8.04	9.8	6.14
1	Bone	4740	1.9	8.64	10.5	6.62
1.2	Bone	4740	1.9	9.79	11.9	7.54
2	Bone	4740	1.9	13.9	16.6	10.9
3	Bone	4740	1.9	18.3	21.5	14.4
4	Bone	4740	1.9	22.1	25.6	17.5
5	Bone	4740	1.9	25.5	29.2	20.4
6	Bone	4740	1.9	28.7	32.4	22.9
7	Bone	4740	1.9	31.7	35.3	25.3
8	Bone	4740	1.9	34.4	38	27.5
9	Bone	4740	1.9	37	40.4	29.5
10	Bone	4740	1.9	39.3	42.7	31.4
12	Bone	4740	1.9	43.3	46.7	34.7
14	Bone	4740	1.9	46.6	50.1	37.7
15	Bone	4740	1.9	48	51.5	39
16	Bone	4740	1.9	49.3	52.8	40.2
18	Bone	4740	1.9	51.6	55	42.6
20	Bone	4740	1.9	53.5	56.9	45.1
1e-09	colon	762	1.04	0.89	0.77	0.11
1e-08	colon	762	1.04	1.06	0.96	0.16
2.5e-08	colon	762	1.04	1.28	1.13	0.19
1e-07	colon	762	1.04	1.79	1.42	0.28
2e-07	colon	762	1.04	2.09	1.58	0.32
5e-07	colon	762	1.04	2.48	1.8	0.39
1e-06	colon	762	1.04	2.75	1.69	0.44
2e-06	colon	762	1.04	2.91	2.07	0.46
5e-06	colon	762	1.04	3.02	2.19	0.49
1e-05	colon	762	1.04	3.04	2.25	0.5
2e-05	colon	762	1.04	3.05	2.29	0.5
5e-05	colon	762	1.04	3.05	2.31	0.51
0.0001	colon	762	1.04	3.04	2.31	0.5
0.0002	colon	762	1.04	3.04	2.3	0.5
0.0005	colon	762	1.04	3.04	2.29	0.5
0.001	colon	762	1.04	3.04	2.28	0.5
0.002	colon	762	1.04	3.05	2.27	0.5
0.005	colon	762	1.04	3.06	2.27	0.5
0.01	colon	762	1.04	3.07	2.3	0.5
0.02	colon	762	1.04	3.04	2.33	0.5
0.03	colon	762	1.04	3.04	2.37	0.5
0.05	colon	762	1.04	3.05	2.46	0.51
0.07	colon	762	1.04	3.1	2.55	0.52
0.1	colon	762	1.04	3.2	2.67	0.53
0.15	colon	762	1.04	3.43	2.84	0.55
0.2	colon	762	1.04	3.66	3	0.57
0.3	colon	762	1.04	4.22	3.31	0.62
0.5	colon	762	1.04	5.49	3.9	0.77
0.7	colon	762	1.04	6.94	4.53	0.92
0.9	colon	762	1.04	8.52	5.4	1.12
1	colon	762	1.04	9.35	5.93	1.26
1.2	colon	762	1.04	11.1	7.15	1.61
2	colon	762	1.04	17.4	12.6	3.61
3	colon	762	1.04	24.5	18.7	6.04
4	colon	762	1.04	30.5	23.8	8.32
5	colon	762	1.04	35.6	28.2	10.5
6	colon	762	1.04	40	32	12.6
7	colon	762	1.04	43.9	35.6	14.7
8	colon	762	1.04	47.4	38.9	16.7
9	colon	762	1.04	50.5	42.1	18.5
10	colon	762	1.04	53.3	45.1	20.3
12	colon	762	1.04	58.1	50.6	23.4
14	colon	762	1.04	62.1	55.3	26.1
15	colon	762	1.04	63.8	57.4	27.4
16	colon	762	1.04	65.4	59.3	28.6
18	colon	762	1.04	68.2	62.8	30.9
20	colon	762	1.04	70.7	65.7	33
1e-09	Gonad	39.1	1.04	2	0.36	0.15
1e-08	Gonad	39.1	1.04	2.5	0.47	0.19
2.5e-08	Gonad	39.1	1.04	2.75	0.55	0.22
1e-07	Gonad	39.1	1.04	3.31	0.7	0.27
2e-07	Gonad	39.1	1.04	3.59	0.78	0.31
5e-07	Gonad	39.1	1.04	3.91	0.89	0.35
1e-06	Gonad	39.1	1.04	4.1	0.96	0.38
2e-06	Gonad	39.1	1.04	4.22	1.03	0.41
5e-06	Gonad	39.1	1.04	4.27	1.12	0.43
1e-05	Gonad	39.1	1.04	4.22	1.17	0.44
2e-05	Gonad	39.1	1.04	4.13	1.21	0.45
5e-05	Gonad	39.1	1.04	3.95	1.25	0.46
0.0001	Gonad	39.1	1.04	3.81	1.25	0.46
0.0002	Gonad	39.1	1.04	3.66	1.24	0.46
0.0005	Gonad	39.1	1.04	3.5	1.21	0.45
0.001	Gonad	39.1	1.04	3.42	1.18	0.44
0.002	Gonad	39.1	1.04	3.41	1.16	0.43
0.005	Gonad	39.1	1.04	3.51	1.15	0.42
0.01	Gonad	39.1	1.04	3.69	1.15	0.43
0.02	Gonad	39.1	1.04	4	1.14	0.43
0.03	Gonad	39.1	1.04	4.25	1.15	0.44
0.05	Gonad	39.1	1.04	4.8	1.18	0.45
0.07	Gonad	39.1	1.04	5.44	1.21	0.47
0.1	Gonad	39.1	1.04	6.48	1.25	0.49
0.15	Gonad	39.1	1.04	8.25	1.29	0.51
0.2	Gonad	39.1	1.04	9.97	1.34	0.53
0.3	Gonad	39.1	1.04	13.1	1.45	0.59
0.5	Gonad	39.1	1.04	18.4	1.7	0.73
0.7	Gonad	39.1	1.04	22.4	1.95	0.85
0.9	Gonad	39.1	1.04	25.7	2.24	1.03
1	Gonad	39.1	1.04	27.1	2.41	1.15
1.2	Gonad	39.1	1.04	29.6	3.02	1.55
2	Gonad	39.1	1.04	36.7	6.43	4.22
3	Gonad	39.1	1.04	42.7	11.9	8.03
4	Gonad	39.1	1.04	47.4	17.3	11.6
5	Gonad	39.1	1.04	51.7	21.5	14.8
6	Gonad	39.1	1.04	55.8	25.4	17.9
7	Gonad	39.1	1.04	59.7	29.1	20.7
8	Gonad	39.1	1.04	63.3	32.7	23.3
9	Gonad	39.1	1.04	66.7	36	25.7
10	Gonad	39.1	1.04	69.6	39.3	27.9
12	Gonad	39.1	1.04	74.3	45.4	31.9
14	Gonad	39.1	1.04	77.4	50.5	35.3
15	Gonad	39.1	1.04	78.5	52.6	36.9
16	Gonad	39.1	1.04	79.3	54.4	38.3
18	Gonad	39.1	1.04	80.1	57.6	41
20	Gonad	39.1	1.04	80.4	60.1	43.5
1e-09	Lung	1000	0.26	0.77	0.81	0.33
1e-08	Lung	1000	0.26	0.95	1.05	0.42
2.5e-08	Lung	1000	0.26	1.11	1.27	0.49
1e-07	Lung	1000	0.26	1.52	1.67	0.63
2e-07	Lung	1000	0.26	1.74	1.89	0.71
5e-07	Lung	1000	0.26	2.03	2.18	0.81
1e-06	Lung	1000	0.26	2.21	2.38	0.88
2e-06	Lung	1000	0.26	2.32	2.53	0.94
5e-06	Lung	1000	0.26	2.39	2.59	0.99
1e-05	Lung	1000	0.26	2.4	2.6	1.01
2e-05	Lung	1000	0.26	2.39	2.59	1.03
5e-05	Lung	1000	0.26	2.36	2.55	1.03
0.0001	Lung	1000	0.26	2.34	2.52	1.02
0.0002	Lung	1000	0.26	2.34	2.51	1.01
0.0005	Lung	1000	0.26	2.33	2.2	1
0.001	Lung	1000	0.26	2.33	2.5	0.98
0.002	Lung	1000	0.26	2.32	2.49	0.97
0.005	Lung	1000	0.26	2.31	2.49	0.95
0.01	Lung	1000	0.26	2.31	2.5	0.96
0.02	Lung	1000	0.26	2.31	2.46	0.95
0.03	Lung	1000	0.26	2.32	2.47	0.96
0.05	Lung	1000	0.26	2.38	2.58	1
0.07	Lung	1000	0.26	2.46	2.71	1.05
0.1	Lung	1000	0.26	2.62	3	1.13
0.15	Lung	1000	0.26	3.06	3.68	1.26
0.2	Lung	1000	0.26	3.49	4.3	1.39
0.3	Lung	1000	0.26	4.43	5.43	1.67
0.5	Lung	1000	0.26	6.28	7.7	2.26
0.7	Lung	1000	0.26	8.21	9.97	2.92
0.9	Lung	1000	0.26	10.1	12.2	3.64
1	Lung	1000	0.26	11.1	13.3	4.04
1.2	Lung	1000	0.26	12.9	15.5	4.96
2	Lung	1000	0.26	19.7	23.6	9.12
3	Lung	1000	0.26	27.1	31.8	13.9
4	Lung	1000	0.26	33.1	38	18
5	Lung	1000	0.26	38.2	43.1	21.5
6	Lung	1000	0.26	42.6	47.3	24.6
7	Lung	1000	0.26	46.4	50.9	27.4
8	Lung	1000	0.26	49.7	54.1	29.9
9	Lung	1000	0.26	52.7	57	32.2
10	Lung	1000	0.26	55.3	59.7	34.3
12	Lung	1000	0.26	59.7	64.3	38.2
14	Lung	1000	0.26	63.3	67.9	41.5
15	Lung	1000	0.26	64.8	69.5	43
16	Lung	1000	0.26	66.2	70.8	44.5
18	Lung	1000	0.26	68.5	73.1	47.1
20	Lung	1000	0.26	70	74.9	49.5
1e-09	Liver	1910	1.05	0.98	0.7	0.11
1e-08	Liver	1910	1.05	1.2	0.92	0.12
2.5e-08	Liver	1910	1.05	1.45	1.1	0.14
1e-07	Liver	1910	1.05	2.06	1.46	0.18
2e-07	Liver	1910	1.05	2.36	1.65	0.2
5e-07	Liver	1910	1.05	2.74	1.91	0.23
1e-06	Liver	1910	1.05	2.99	2.09	0.25
2e-06	Liver	1910	1.05	3.15	2.23	0.27
5e-06	Liver	1910	1.05	3.27	2.37	0.28
1e-05	Liver	1910	1.05	3.3	2.44	0.29
2e-05	Liver	1910	1.05	3.28	2.48	0.3
5e-05	Liver	1910	1.05	3.22	2.49	0.31
0.0001	Liver	1910	1.05	3.16	2.48	0.31
0.0002	Liver	1910	1.05	3.15	2.45	0.31
0.0005	Liver	1910	1.05	3.13	2.4	0.3
0.001	Liver	1910	1.05	3.13	2.36	0.3
0.002	Liver	1910	1.05	3.1	2.34	0.3
0.005	Liver	1910	1.05	3.08	2.32	0.29
0.01	Liver	1910	1.05	3.08	2.34	0.3
0.02	Liver	1910	1.05	3.06	2.32	0.31
0.03	Liver	1910	1.05	3.09	2.33	0.32
0.05	Liver	1910	1.05	3.18	2.41	0.33
0.07	Liver	1910	1.05	3.3	2.5	0.35
0.1	Liver	1910	1.05	3.51	2.64	0.36
0.15	Liver	1910	1.05	3.99	2.85	0.38
0.2	Liver	1910	1.05	4.47	3.08	0.39
0.3	Liver	1910	1.05	5.56	3.55	0.42
0.5	Liver	1910	1.05	7.69	4.59	0.46
0.7	Liver	1910	1.05	9.75	5.77	0.49
0.9	Liver	1910	1.05	11.7	6.99	0.58
1	Liver	1910	1.05	12.7	7.62	0.63
1.2	Liver	1910	1.05	14.6	9	0.79
2	Liver	1910	1.05	21.4	14.7	1.84
3	Liver	1910	1.05	28.6	21.3	3.42
4	Liver	1910	1.05	34.6	26.9	5.21
5	Liver	1910	1.05	39.7	31.4	7.11
6	Liver	1910	1.05	44.2	35.4	8.99
7	Liver	1910	1.05	48.2	39.1	10.9
8	Liver	1910	1.05	51.8	42.4	12.7
9	Liver	1910	1.05	55	45.4	14.4
10	Liver	1910	1.05	57.8	48.3	16.2
12	Liver	1910	1.05	62.4	53.3	19.4
14	Liver	1910	1.05	66	57.4	22.3
15	Liver	1910	1.05	67.5	59.1	23.7
16	Liver	1910	1.05	68.7	60.6	25
18	Liver	1910	1.05	70.8	63.1	27.4
20	Liver	1910	1.05	72.4	65.2	29.5
1e-09	Oesophagus	35	1.04	0.5	0.95	0.3
1e-08	Oesophagus	35	1.04	0.73	1.13	0.37
2.5e-08	Oesophagus	35	1.04	0.88	1.3	0.42
1e-07	Oesophagus	35	1.04	1.24	1.79	0.52
2e-07	Oesophagus	35	1.04	1.43	2.04	0.59
5e-07	Oesophagus	35	1.04	1.69	2.37	0.68
1e-06	Oesophagus	35	1.04	1.87	2.59	0.76
2e-06	Oesophagus	35	1.04	2	2.76	0.81
5e-06	Oesophagus	35	1.04	2.13	2.94	0.88
1e-05	Oesophagus	35	1.04	2.19	3.03	0.91
2e-05	Oesophagus	35	1.04	2.22	3.08	0.93
5e-05	Oesophagus	35	1.04	2.24	3.12	0.94
0.0001	Oesophagus	35	1.04	2.24	3.12	0.94
0.0002	Oesophagus	35	1.04	2.26	3.12	0.95
0.0005	Oesophagus	35	1.04	2.28	3.11	0.94
0.001	Oesophagus	35	1.04	2.31	3.09	0.94
0.002	Oesophagus	35	1.04	2.35	3.05	0.94
0.005	Oesophagus	35	1.04	2.41	3.02	0.95
0.01	Oesophagus	35	1.04	2.45	3.01	0.96
0.02	Oesophagus	35	1.04	2.47	2.96	0.95
0.03	Oesophagus	35	1.04	2.49	2.97	0.96
0.05	Oesophagus	35	1.04	2.52	3.03	0.98
0.07	Oesophagus	35	1.04	2.55	3.11	1.02
0.1	Oesophagus	35	1.04	2.63	3.25	1.07
0.15	Oesophagus	35	1.04	2.7	3.42	1.13
0.2	Oesophagus	35	1.04	2.82	3.62	1.2
0.3	Oesophagus	35	1.04	3.14	4.08	1.36
0.5	Oesophagus	35	1.04	4.06	5.11	1.72
0.7	Oesophagus	35	1.04	5.34	6.35	2.09
0.9	Oesophagus	35	1.04	6.83	7.6	2.53
1	Oesophagus	35	1.04	7.65	8.23	2.77
1.2	Oesophagus	35	1.04	9.45	9.46	3.41
2	Oesophagus	35	1.04	16	14.2	6.59
3	Oesophagus	35	1.04	23.7	19.7	11.1
4	Oesophagus	35	1.04	30	24.7	15.3
5	Oesophagus	35	1.04	35.2	29.4	19.3
6	Oesophagus	35	1.04	39.6	33.7	23
7	Oesophagus	35	1.04	43.2	37.8	26.4
8	Oesophagus	35	1.04	46.3	41.5	29.6
9	Oesophagus	35	1.04	49	44.9	32.5
10	Oesophagus	35	1.04	51.3	48.1	35.3
12	Oesophagus	35	1.04	55.1	53.5	40.3
14	Oesophagus	35	1.04	58	57.9	44.3
15	Oesophagus	35	1.04	59.2	59.7	46
16	Oesophagus	35	1.04	60.3	61.3	47.5
18	Oesophagus	35	1.04	62.2	64	50.1
20	Oesophagus	35	1.04	63.7	66.2	52.2
1e-09	Skin	3010	1.1	1.35	1.3	0.66
1e-08	Skin	3010	1.1	1.38	1.34	0.68
2.5e-08	Skin	3010	1.1	1.43	1.4	0.7
1e-07	Skin	3010	1.1	1.54	1.51	0.73
2e-07	Skin	3010	1.1	1.61	1.58	0.75
5e-07	Skin	3010	1.1	1.68	1.66	0.77
1e-06	Skin	3010	1.1	1.72	1.71	0.78
2e-06	Skin	3010	1.1	1.75	1.74	0.78
5e-06	Skin	3010	1.1	1.76	1.75	0.78
1e-05	Skin	3010	1.1	1.75	1.74	0.78
2e-05	Skin	3010	1.1	1.72	1.71	0.77
5e-05	Skin	3010	1.1	1.67	1.66	0.75
0.0001	Skin	3010	1.1	1.62	1.61	0.73
0.0002	Skin	3010	1.1	1.56	1.55	0.71
0.0005	Skin	3010	1.1	1.49	1.48	0.68
0.001	Skin	3010	1.1	1.46	1.45	0.66
0.002	Skin	3010	1.1	1.48	1.48	0.69
0.005	Skin	3010	1.1	1.66	1.65	0.8
0.01	Skin	3010	1.1	1.94	1.93	0.98
0.02	Skin	3010	1.1	2.38	2.38	1.13
0.03	Skin	3010	1.1	2.73	2.72	1.59
0.05	Skin	3010	1.1	3.35	3.34	2.08
0.07	Skin	3010	1.1	3.92	3.9	2.52
0.1	Skin	3010	1.1	4.72	4.7	3.11
0.15	Skin	3010	1.1	5.94	5.92	4.02
0.2	Skin	3010	1.1	7.03	7.01	4.84
0.3	Skin	3010	1.1	8.95	8.93	6.29
0.5	Skin	3010	1.1	12	12	8.67
0.7	Skin	3010	1.1	14.5	14.4	10.6
0.9	Skin	3010	1.1	16.5	16.5	12.3
1	Skin	3010	1.1	17.4	17.3	13.1
1.2	Skin	3010	1.1	19	18.9	14.5
2	Skin	3010	1.1	23.9	23.9	19
3	Skin	3010	1.1	28.5	28.4	23.5
4	Skin	3010	1.1	32.5	32.4	27.4
5	Skin	3010	1.1	36.4	36.3	30.9
6	Skin	3010	1.1	40.2	40.1	34.1
7	Skin	3010	1.1	43.9	43.8	37.1
8	Skin	3010	1.1	47.4	47.4	39.8
9	Skin	3010	1.1	50.7	50.7	42.3
10	Skin	3010	1.1	53.6	53.6	44.5
12	Skin	3010	1.1	58.2	58.2	48.3
14	Skin	3010	1.1	61.2	61.3	51.4
15	Skin	3010	1.1	62.3	62.4	52.7
16	Skin	3010	1.1	63	63.1	53.9
18	Skin	3010	1.1	63.8	63.9	56
20	Skin	3010	1.1	64.1	64.1	57.7
1e-09	Stomach	158	1.04	1.23	0.5	0.49
1e-08	Stomach	158	1.04	1.6	0.64	0.55
2.5e-08	Stomach	158	1.04	1.9	0.77	0.6
1e-07	Stomach	158	1.04	2.59	1.03	0.72
2e-07	Stomach	158	1.04	2.97	1.16	0.82
5e-07	Stomach	158	1.04	3.46	1.35	0.99
1e-06	Stomach	158	1.04	3.78	1.48	1.13
2e-06	Stomach	158	1.04	4.01	1.59	1.21
5e-06	Stomach	158	1.04	4.17	1.71	1.29
1e-05	Stomach	158	1.04	4.2	1.77	1.32
2e-05	Stomach	158	1.04	4.17	1.82	1.33
5e-05	Stomach	158	1.04	4.08	1.85	1.34
0.0001	Stomach	158	1.04	4	1.85	1.34
0.0002	Stomach	158	1.04	3.95	1.83	1.34
0.0005	Stomach	158	1.04	3.91	1.8	1.35
0.001	Stomach	158	1.04	3.91	1.77	1.35
0.002	Stomach	158	1.04	3.92	1.76	1.35
0.005	Stomach	158	1.04	3.9	1.76	1.36
0.01	Stomach	158	1.04	3.87	1.77	1.38
0.02	Stomach	158	1.04	3.87	1.79	1.38
0.03	Stomach	158	1.04	3.85	1.81	1.39
0.05	Stomach	158	1.04	3.94	1.86	1.44
0.07	Stomach	158	1.04	4.05	1.91	1.5
0.1	Stomach	158	1.04	4.32	1.98	1.6
0.15	Stomach	158	1.04	5.09	2.07	1.73
0.2	Stomach	158	1.04	5.85	2.17	1.87
0.3	Stomach	158	1.04	7.39	2.32	2.2
0.5	Stomach	158	1.04	10.3	2.65	2.94
0.7	Stomach	158	1.04	12.9	2.95	3.83
0.9	Stomach	158	1.04	15.4	3.42	4.81
1	Stomach	158	1.04	16.6	3.72	5.32
1.2	Stomach	158	1.04	18.8	4.64	6.43
2	Stomach	158	1.04	26.4	8.82	11.3
3	Stomach	158	1.04	34.1	14.5	16.8
4	Stomach	158	1.04	40.4	19.8	21.8
5	Stomach	158	1.04	45.6	24.2	26.3
6	Stomach	158	1.04	50.1	28	30.6
7	Stomach	158	1.04	54	31.6	34.6
8	Stomach	158	1.04	57.4	34.8	38.2
9	Stomach	158	1.04	60.5	37.8	41.5
10	Stomach	158	1.04	63.2	40.5	44.5
12	Stomach	158	1.04	67.8	45.4	49.7
14	Stomach	158	1.04	71.4	49.5	53.9
15	Stomach	158	1.04	72.9	51.4	55.6
16	Stomach	158	1.04	74.3	53	57.1
18	Stomach	158	1.04	76.5	56	59.7
20	Stomach	158	1.04	78.4	58.6	61.7
1e-09	Adrenals	8	1.02	0.59	0.78	0.25
1e-08	Adrenals	8	1.02	0.66	0.92	0.31
1e-07	Adrenals	8	1.02	0.87	1.36	0.38
1e-06	Adrenals	8	1.02	1.42	2.15	0.56
1e-05	Adrenals	8	1.02	1.52	2.62	0.68
0.0001	Adrenals	8	1.02	1.69	2.73	0.69
0.001	Adrenals	8	1.02	1.63	2.8	0.71
0.01	Adrenals	8	1.02	1.73	2.83	0.74
0.05	Adrenals	8	1.02	1.86	2.96	0.78
0.1	Adrenals	8	1.02	2.07	3.16	0.87
0.5	Adrenals	8	1.02	2.84	4.7	1.25
1	Adrenals	8	1.02	3.29	5.74	1.45
3	Adrenals	8	1.02	11.36	20.74	5.17
5	Adrenals	8	1.02	18.46	29.19	9.72
8	Adrenals	8	1.02	27.62	40.82	15.55
10	Adrenals	8	1.02	32.34	46.46	18.9
12	Adrenals	8	1.02	36.79	52.16	22.61
15	Adrenals	8	1.02	43.59	58.1	27.36
18	Adrenals	8	1.02	47.73	62.26	32.01
20	Adrenals	8	1.02	51.5	66.41	34.13
1e-09	Bladder	40	1.02	0.97	0.5	0.27		VIP-man data
1e-08	Bladder	40	1.02	1.12	0.61	0.31
1e-07	Bladder	40	1.02	1.61	0.9	0.43
1e-06	Bladder	40	1.02	2.38	1.36	0.6
1e-05	Bladder	40	1.02	2.65	1.58	0.72
0.0001	Bladder	40	1.02	2.9	1.56	0.75
0.001	Bladder	40	1.02	2.94	1.66	0.77
0.01	Bladder	40	1.02	2.92	1.67	0.78
0.05	Bladder	40	1.02	3.23	1.8	0.82
0.1	Bladder	40	1.02	3.43	1.93	0.89
0.5	Bladder	40	1.02	5.52	2.8	1.26
1	Bladder	40	1.02	8.19	3.36	1.53
3	Bladder	40	1.02	24.91	13.57	7.57
5	Bladder	40	1.02	36	22.62	14.1
8	Bladder	40	1.02	46.45	32.67	22.44
10	Bladder	40	1.02	53.8	39.52	26.73
12	Bladder	40	1.02	59.28	44.59	30.49
15	Bladder	40	1.02	66.05	51.76	36.77
18	Bladder	40	1.02	68.7	56.24	41.47
20	Bladder	40	1.02	72.97	60.2	44.04
1e-09	Oesophagus	40	1.04	0.8	0.67	0.28
1e-08	Oesophagus	40	1.04	0.99	0.82	0.31
1e-07	Oesophagus	40	1.04	1.45	1.31	0.46
1e-06	Oesophagus	40	1.04	2.2	1.98	0.61
1e-05	Oesophagus	40	1.04	2.57	2.38	0.73
0.0001	Oesophagus	40	1.04	2.6	2.53	0.73
0.001	Oesophagus	40	1.04	2.68	2.65	0.77
0.01	Oesophagus	40	1.04	2.78	2.53	0.75
0.05	Oesophagus	40	1.04	2.95	2.76	0.82
0.1	Oesophagus	40	1.04	3.16	2.9	0.9
0.5	Oesophagus	40	1.04	5.39	4.39	1.22
1	Oesophagus	40	1.04	7.42	5.64	1.51
3	Oesophagus	40	1.04	23.06	19.36	6.58
5	Oesophagus	40	1.04	33.65	29.63	12.05
8	Oesophagus	40	1.04	44.83	39.55	19.19
10	Oesophagus	40	1.04	50.15	45.26	23.11
12	Oesophagus	40	1.04	55.46	50.21	26.41
15	Oesophagus	40	1.04	61.4	56.88	31.87
18	Oesophagus	40	1.04	65.97	60.47	36.85
20	Oesophagus	40	1.04	69.77	64.14	39.74
1e-09	Bone	10263	1.9	0.86	0.64	0.48
1e-08	Bone	10263	1.9	1	0.77	0.57
1e-07	Bone	10263	1.9	1.43	1.16	0.84
1e-06	Bone	10263	1.9	1.9	1.68	1.13
1e-05	Bone	10263	1.9	2.05	1.91	1.22
0.0001	Bone	10263	1.9	2.01	1.93	1.18
0.001	Bone	10263	1.9	1.92	1.89	1.12
0.01	Bone	10263	1.9	1.86	1.87	1.08
0.05	Bone	10263	1.9	1.99	1.97	1.16
0.1	Bone	10263	1.9	2.22	2.12	1.29
0.5	Bone	10263	1.9	3.96	3.33	2.4
1	Bone	10263	1.9	5.43	4.3	3.35
3	Bone	10263	1.9	11.11	10.01	7.4
5	Bone	10263	1.9	15.97	14.7	11.1
8	Bone	10263	1.9	21.25	19.97	15.22
10	Bone	10263	1.9	24.93	23.54	18.14
12	Bone	10263	1.9	27.92	26.44	20.35
15	Bone	10263	1.9	31.37	30.07	23.34
18	Bone	10263	1.9	34.13	32.95	25.99
20	Bone	10263	1.9	37.3	35.96	28.59
1e-09	Brain	1247.4	1.04	0.5	0.62	0.7
1e-08	Brain	1247.4	1.04	0.55	0.76	0.86
1e-07	Brain	1247.4	1.04	0.82	1.16	1.34
1e-06	Brain	1247.4	1.04	1.18	1.65	1.89
1e-05	Brain	1247.4	1.04	1.34	1.87	2.13
0.0001	Brain	1247.4	1.04	1.34	1.83	2.07
0.001	Brain	1247.4	1.04	1.29	1.76	1.98
0.01	Brain	1247.4	1.04	1.25	1.68	1.93
0.05	Brain	1247.4	1.04	1.38	1.88	2.15
0.1	Brain	1247.4	1.04	1.6	2.2	2.52
0.5	Brain	1247.4	1.04	3.81	5.62	6.57
1	Brain	1247.4	1.04	6.04	8.7	10.23
3	Brain	1247.4	1.04	19.72	24.55	27.04
5	Brain	1247.4	1.04	28.82	34.2	37.2
8	Brain	1247.4	1.04	37.97	43.47	46.62
10	Brain	1247.4	1.04	42.99	48.7	52.03
12	Brain	1247.4	1.04	47.22	53.24	56.8
15	Brain	1247.4	1.04	52.28	58.02	61.66
18	Brain	1247.4	1.04	56.38	61.88	65.44
20	Brain	1247.4	1.04	60.4	66.1	69.83
1e-09	Liver	1935.5	1.05	0.89	0.66	0.16
1e-08	Liver	1935.5	1.05	1.06	0.8	0.17
1e-07	Liver	1935.5	1.05	1.58	1.21	0.24
1e-06	Liver	1935.5	1.05	2.3	1.78	0.35
1e-05	Liver	1935.5	1.05	2.69	2.08	0.39
0.0001	Liver	1935.5	1.05	2.81	2.16	0.41
0.001	Liver	1935.5	1.05	2.85	2.26	0.41
0.01	Liver	1935.5	1.05	2.86	2.27	0.42
0.05	Liver	1935.5	1.05	3.02	2.41	0.44
0.1	Liver	1935.5	1.05	3.2	2.59	0.48
0.5	Liver	1935.5	1.05	4.98	3.87	0.67
1	Liver	1935.5	1.05	6.65	5.06	0.81
3	Liver	1935.5	1.05	20	17.12	3.95
5	Liver	1935.5	1.05	29.65	26.24	7.89
8	Liver	1935.5	1.05	39.58	36.34	13.51
10	Liver	1935.5	1.05	45.26	41.65	16.73
12	Liver	1935.5	1.05	50.43	46.68	19.4
15	Liver	1935.5	1.05	56.17	53.15	24.56
18	Liver	1935.5	1.05	59.96	57.47	29.14
20	Liver	1935.5	1.05	63.76	61.3	31.84
1e-09	Heart	401.8	1.03	1.11	0.47	0.34
1e-08	Heart	401.8	1.03	1.35	0.58	0.37
1e-07	Heart	401.8	1.03	2.09	0.88	0.55
1e-06	Heart	401.8	1.03	3.18	1.37	0.79
1e-05	Heart	401.8	1.03	3.72	1.56	0.93
0.0001	Heart	401.8	1.03	3.8	1.7	0.98
0.001	Heart	401.8	1.03	3.82	1.72	0.99
0.01	Heart	401.8	1.03	3.8	1.75	1.01
0.05	Heart	401.8	1.03	4.02	1.91	1.06
0.1	Heart	401.8	1.03	4.32	2.05	1.16
0.5	Heart	401.8	1.03	7.45	3.09	1.94
1	Heart	401.8	1.03	10.56	3.94	2.89
3	Heart	401.8	1.03	28.13	15.75	12.89
5	Heart	401.8	1.03	38.91	24.88	21.17
8	Heart	401.8	1.03	49.46	34.98	30.09
10	Heart	401.8	1.03	55.57	40.36	35.76
12	Heart	401.8	1.03	61.35	45.14	40.1
15	Heart	401.8	1.03	66.43	51.79	46.11
18	Heart	401.8	1.03	69.28	56.96	50.81
20	Heart	401.8	1.03	73.75	60.9	54.6
1e-09	RBM	1118.4	0.98	0.69	0.77	0.34
1e-08	RBM	1118.4	0.98	0.79	0.94	0.4
1e-07	RBM	1118.4	0.98	1.16	1.47	0.57
1e-06	RBM	1118.4	0.98	1.64	2.19	0.81
1e-05	RBM	1118.4	0.98	1.89	2.55	0.93
0.0001	RBM	1118.4	0.98	1.95	2.64	0.96
0.001	RBM	1118.4	0.98	1.93	2.66	0.95
0.01	RBM	1118.4	0.98	1.95	2.68	0.96
0.05	RBM	1118.4	0.98	2.11	2.87	1.05
0.1	RBM	1118.4	0.98	2.33	3.11	1.15
0.5	RBM	1118.4	0.98	4.16	5.32	2.08
1	RBM	1118.4	0.98	5.83	7.59	2.97
3	RBM	1118.4	0.98	17.4	22.95	10.15
5	RBM	1118.4	0.98	26.35	33.15	16.51
8	RBM	1118.4	0.98	35.72	43.06	23.79
10	RBM	1118.4	0.98	41.43	49.2	28.05
12	RBM	1118.4	0.98	46.2	54.41	31.5
15	RBM	1118.4	0.98	52.28	60.22	36.75
18	RBM	1118.4	0.98	56.22	63.44	40.92
20	RBM	1118.4	0.98	60.14	67.72	44.16
1e-09	Kidney	338	1.05	0.62	0.86	0.34
1e-08	Kidney	338	1.05	0.72	1.01	0.39
1e-07	Kidney	338	1.05	1.05	1.55	0.56
1e-06	Kidney	338	1.05	1.46	2.36	0.79
1e-05	Kidney	338	1.05	1.7	2.72	0.92
0.0001	Kidney	338	1.05	1.77	2.84	0.96
0.001	Kidney	338	1.05	1.81	2.98	0.99
0.01	Kidney	338	1.05	1.86	3.03	0.98
0.05	Kidney	338	1.05	1.98	3.2	1.06
0.1	Kidney	338	1.05	2.09	3.4	1.12
0.5	Kidney	338	1.05	2.91	5.02	1.5
1	Kidney	338	1.05	3.55	6.68	1.79
3	Kidney	338	1.05	13.21	22.09	6.34
5	Kidney	338	1.05	21.77	32.84	11.47
8	Kidney	338	1.05	31.73	43.57	17.83
10	Kidney	338	1.05	37.13	50.04	21.44
12	Kidney	338	1.05	42.5	55.63	24.35
15	Kidney	338	1.05	48.99	62.1	29.5
18	Kidney	338	1.05	53.69	65.53	33.43
20	Kidney	338	1.05	57.18	69.51	36.2
1e-09	Lung	910.4	0.26	0.83	0.74	0.3
1e-08	Lung	910.4	0.26	1	0.91	0.34
1e-07	Lung	910.4	0.26	1.5	1.42	0.48
1e-06	Lung	910.4	0.26	2.22	2.15	0.68
1e-05	Lung	910.4	0.26	2.57	2.49	0.77
0.0001	Lung	910.4	0.26	2.63	2.61	0.79
0.001	Lung	910.4	0.26	2.64	2.63	0.8
0.01	Lung	910.4	0.26	2.63	2.64	0.81
0.05	Lung	910.4	0.26	2.76	2.78	0.84
0.1	Lung	910.4	0.26	3	2.97	0.9
0.5	Lung	910.4	0.26	5.61	5.38	1.42
1	Lung	910.4	0.26	8.31	7.95	1.96
3	Lung	910.4	0.26	25.05	25.31	8.1
5	Lung	910.4	0.26	35.75	36.3	14.12
8	Lung	910.4	0.26	45.98	46.58	21.35
10	Lung	910.4	0.26	52.17	52.75	25.41
12	Lung	910.4	0.26	57.4	58.29	28.61
15	Lung	910.4	0.26	63.03	64	33.86
18	Lung	910.4	0.26	66.62	67.71	38.25
20	Lung	910.4	0.26	70.94	72.09	41.49
1e-09	Thyriod	27.5	1.05	1.67	0.45	0.43
1e-08	Thyriod	27.5	1.05	1.99	0.52	0.49
1e-07	Thyriod	27.5	1.05	2.83	0.76	0.72
1e-06	Thyriod	27.5	1.05	4.04	1.18	1.01
1e-05	Thyriod	27.5	1.05	4.49	1.36	1.11
0.0001	Thyriod	27.5	1.05	4.19	1.41	1.13
0.001	Thyriod	27.5	1.05	4.01	1.44	1.11
0.01	Thyriod	27.5	1.05	3.82	1.47	1.05
0.05	Thyriod	27.5	1.05	4.32	1.62	1.1
0.1	Thyriod	27.5	1.05	5.42	1.67	1.18
0.5	Thyriod	27.5	1.05	14.37	2.45	2.17
1	Thyriod	27.5	1.05	22.13	3.03	3.21
3	Thyriod	27.5	1.05	41.02	12.62	10.87
5	Thyriod	27.5	1.05	52.27	20.85	17.48
8	Thyriod	27.5	1.05	61.84	30.22	25.13
10	Thyriod	27.5	1.05	68.32	35.94	29.34
12	Thyriod	27.5	1.05	74.44	40.72	32.78
15	Thyriod	27.5	1.05	78.25	47.02	38.38
18	Thyriod	27.5	1.05	79.92	50.85	42.81
20	Thyriod	27.5	1.05	84.66	54.3	45.65
1e-09	Muscle	42963.9	1.04	0.87	0.88	0.46
1e-08	Muscle	42963.9	1.04	1.01	1.06	0.53
1e-07	Muscle	42963.9	1.04	1.46	1.6	0.78
1e-06	Muscle	42963.9	1.04	2.02	2.29	1.09
1e-05	Muscle	42963.9	1.04	2.25	2.56	1.2
0.0001	Muscle	42963.9	1.04	2.23	2.56	1.19
0.001	Muscle	42963.9	1.04	2.17	2.49	1.15
0.01	Muscle	42963.9	1.04	2.16	2.46	1.13
0.05	Muscle	42963.9	1.04	2.39	2.7	1.27
0.1	Muscle	42963.9	1.04	2.78	3.09	1.48
0.5	Muscle	42963.9	1.04	6.13	6.71	3.37
1	Muscle	42963.9	1.04	9.33	10.22	5.23
3	Muscle	42963.9	1.04	23.31	24.83	13.86
5	Muscle	42963.9	1.04	32.86	34.58	20.43
8	Muscle	42963.9	1.04	42.19	44.01	27.42
10	Muscle	42963.9	1.04	47.95	50.02	31.8
12	Muscle	42963.9	1.04	52.88	55.01	35.2
15	Muscle	42963.9	1.04	58.13	60.16	39.71
18	Muscle	42963.9	1.04	61.8	63.6	43.49
20	Muscle	42963.9	1.04	66.03	67.88	46.88
1e-09	Skin	2296.2	1.1	1.61	1.48	0.87
1e-08	Skin	2296.2	1.1	1.48	1.38	0.79
1e-07	Skin	2296.2	1.1	1.51	1.43	0.8
1e-06	Skin	2296.2	1.1	1.66	1.59	0.87
1e-05	Skin	2296.2	1.1	1.66	1.6	0.86
0.0001	Skin	2296.2	1.1	1.55	1.51	0.81
0.001	Skin	2296.2	1.1	1.48	1.44	0.77
0.01	Skin	2296.2	1.1	1.8	1.74	0.97
0.05	Skin	2296.2	1.1	3.32	3.1	1.91
0.1	Skin	2296.2	1.1	4.82	4.44	2.83
0.5	Skin	2296.2	1.1	11.48	10.34	7.1
1	Skin	2296.2	1.1	17.95	16.09	11.32
3	Skin	2296.2	1.1	28.81	26.34	20.38
5	Skin	2296.2	1.1	37.68	34.92	27.81
8	Skin	2296.2	1.1	45.9	43.02	34.85
10	Skin	2296.2	1.1	51.55	48.65	39.81
12	Skin	2296.2	1.1	56.29	53.19	43.49
15	Skin	2296.2	1.1	60.28	57.35	47.45
18	Skin	2296.2	1.1	63.88	61.05	51.29
20	Skin	2296.2	1.1	68.56	65.6	55.34
1e-09	Stomach	150	1.04	0.97	0.51	0.42
1e-08	Stomach	150	1.04	1.19	0.61	0.48
1e-07	Stomach	150	1.04	1.8	0.93	0.71
1e-06	Stomach	150	1.04	2.67	1.36	1.04
1e-05	Stomach	150	1.04	3.14	1.55	1.25
0.0001	Stomach	150	1.04	3.24	1.64	1.29
0.001	Stomach	150	1.04	3.3	1.72	1.29
0.01	Stomach	150	1.04	3.34	1.73	1.34
0.05	Stomach	150	1.04	3.51	1.84	1.43
0.1	Stomach	150	1.04	3.66	2.01	1.52
0.5	Stomach	150	1.04	5.97	2.85	2.49
1	Stomach	150	1.04	8.2	3.51	3.5
3	Stomach	150	1.04	22.92	12.72	14.13
5	Stomach	150	1.04	32.94	20.49	22.7
8	Stomach	150	1.04	42.91	29.8	31.93
10	Stomach	150	1.04	48.86	34.36	37.23
12	Stomach	150	1.04	54.08	38.95	41.59
15	Stomach	150	1.04	59.74	45.75	47.73
18	Stomach	150	1.04	62.51	50.33	52.2
20	Stomach	150	1.04	66.42	54.12	56.27
1e-09	Gonad	21.4	1.04	2.3	0.35	0.28
1e-08	Gonad	21.4	1.04	2.53	0.42	0.29
1e-07	Gonad	21.4	1.04	3.24	0.61	0.42
1e-06	Gonad	21.4	1.04	4	0.85	0.53
1e-05	Gonad	21.4	1.04	4.06	0.89	0.61
0.0001	Gonad	21.4	1.04	3.9	1.03	0.7
0.001	Gonad	21.4	1.04	3.85	1.13	0.63
0.01	Gonad	21.4	1.04	3.52	0.98	0.64
0.05	Gonad	21.4	1.04	4.62	1.07	0.67
0.1	Gonad	21.4	1.04	6.01	1.12	0.7
0.5	Gonad	21.4	1.04	14.54	1.55	0.88
1	Gonad	21.4	1.04	22.68	1.94	1.31
3	Gonad	21.4	1.04	40.55	8.15	7.17
5	Gonad	21.4	1.04	51.95	16.16	13.56
8	Gonad	21.4	1.04	60.88	24.67	21.94
10	Gonad	21.4	1.04	66.83	31.22	26.3
12	Gonad	21.4	1.04	73.12	35.19	29.42
15	Gonad	21.4	1.04	75.82	43.42	35.24
18	Gonad	21.4	1.04	77.38	48.38	40.44
20	Gonad	21.4	1.04	82.45	51.96	44.38
1e-09	RBM	1170	0.98	0.965516	1.17057	0.420045		ICRP-ref-man-mesh
1e-08	RBM	1170	0.98	1.05068	1.30211	0.453852
2.5e-08	RBM	1170	0.98	1.22097	1.53033	0.524141
1e-07	RBM	1170	0.98	1.61912	2.07455	0.692776
2e-07	RBM	1170	0.98	1.83895	2.38523	0.786564
5e-07	RBM	1170	0.98	2.12436	2.79559	0.90601
1e-06	RBM	1170	0.98	2.282	3.02608	0.971236
2e-06	RBM	1170	0.98	2.40905	3.2122	1.02435
5e-06	RBM	1170	0.98	2.51208	3.36665	1.06572
1e-05	RBM	1170	0.98	2.54613	3.41959	1.07499
2e-05	RBM	1170	0.98	2.55926	3.44495	1.07792
5e-05	RBM	1170	0.98	2.56581	3.45569	1.07542
0.0001	RBM	1170	0.98	2.5627	3.44993	1.07185
0.0002	RBM	1170	0.98	2.55647	3.4379	1.06199
0.0005	RBM	1170	0.98	2.53889	3.41692	1.05247
0.001	RBM	1170	0.98	2.52813	3.39661	1.04441
0.002	RBM	1170	0.98	2.51924	3.38029	1.03397
0.005	RBM	1170	0.98	2.51027	3.35765	1.03036
0.01	RBM	1170	0.98	2.52107	3.35966	1.03201
0.02	RBM	1170	0.98	2.56156	3.39086	1.04923
0.03	RBM	1170	0.98	2.61288	3.44159	1.07378
0.05	RBM	1170	0.98	2.73044	3.56849	1.13202
0.07	RBM	1170	0.98	2.83544	3.686	1.18362
0.1	RBM	1170	0.98	3.02724	3.898	1.27412
0.15	RBM	1170	0.98	3.32049	4.24716	1.42102
0.2	RBM	1170	0.98	3.64019	4.64132	1.57575
0.3	RBM	1170	0.98	4.21429	5.39119	1.86289
0.5	RBM	1170	0.98	5.53187	7.24574	2.51032
0.7	RBM	1170	0.98	6.82775	9.04689	3.15601
0.9	RBM	1170	0.98	7.96383	10.6156	3.73178
1	RBM	1170	0.98	7.60893	10.0571	3.55918
1.2	RBM	1170	0.98	9.82972	13.1429	4.6902
1.5	RBM	1170	0.98	11.9245	15.8763	5.80132
2	RBM	1170	0.98	15.0877	19.7601	7.59815
3	RBM	1170	0.98	20.8648	26.3241	11.1952
4	RBM	1170	0.98	25.8824	32.4473	13.9821
5	RBM	1170	0.98	30.0277	36.1264	17.4859
6	RBM	1170	0.98	33.4761	39.8153	19.7866
7	RBM	1170	0.98	36.6398	42.476	22.9687
8	RBM	1170	0.98	39.2211	45.4172	24.5946
9	RBM	1170	0.98	41.5071	47.7366	26.4095
10	RBM	1170	0.98	44.0096	50.1962	28.3372
12	RBM	1170	0.98	49.0483	55.6601	31.7707
14	RBM	1170	0.98	52.838	59.0268	35.3413
15	RBM	1170	0.98	54.6351	60.8708	36.6104
16	RBM	1170	0.98	55.6941	61.6477	38.0252
18	RBM	1170	0.98	57.7755	63.1893	40.363
20	RBM	1170	0.98	58.3315	63.387	41.0707
1e-09	colon	450	1.04	1.43531	0.713181	0.561532
1e-08	colon	450	1.04	1.64363	0.76975	0.632846
2.5e-08	colon	450	1.04	1.90863	0.893072	0.747383
1e-07	colon	450	1.04	2.56694	1.19031	1.00625
2e-07	colon	450	1.04	2.90536	1.36978	1.14853
5e-07	colon	450	1.04	3.41258	1.60719	1.34705
1e-06	colon	450	1.04	3.66309	1.73655	1.42161
2e-06	colon	450	1.04	3.86026	1.84716	1.55532
5e-06	colon	450	1.04	4.04008	1.93889	1.5889
1e-05	colon	450	1.04	4.02532	1.98315	1.61503
2e-05	colon	450	1.04	4.16385	2.02107	1.61039
5e-05	colon	450	1.04	4.13104	2.01801	1.58797
0.0001	colon	450	1.04	4.10362	2.04335	1.57048
0.0002	colon	450	1.04	4.06314	2.03174	1.56872
0.0005	colon	450	1.04	4.01759	2.04187	1.56806
0.001	colon	450	1.04	4.0001	2.05242	1.51036
0.002	colon	450	1.04	3.95833	2.03456	1.52576
0.005	colon	450	1.04	3.92029	2.05457	1.45324
0.01	colon	450	1.04	3.90721	2.07068	1.46739
0.02	colon	450	1.04	3.9091	2.08948	1.49627
0.03	colon	450	1.04	4.01084	2.11561	1.53301
0.05	colon	450	1.04	4.13582	2.18825	1.58664
0.07	colon	450	1.04	4.26181	2.24148	1.66836
0.1	colon	450	1.04	4.45981	2.33388	1.74718
0.15	colon	450	1.04	4.90131	2.45524	2.00818
0.2	colon	450	1.04	5.39018	2.60177	2.24003
0.3	colon	450	1.04	6.38068	2.85247	2.79315
0.5	colon	450	1.04	8.83796	3.53005	4.01922
0.7	colon	450	1.04	10.9841	4.27877	5.26881
0.9	colon	450	1.04	13.1944	4.93467	6.1859
1	colon	450	1.04	12.742	4.48362	6.02169
1.2	colon	450	1.04	16.1801	6.22469	8.01355
1.5	colon	450	1.04	19.3322	7.8919	9.70232
2	colon	450	1.04	23.9773	10.7024	12.4863
3	colon	450	1.04	31.1211	16.1336	17.4721
4	colon	450	1.04	37.7259	20.2619	21.6397
5	colon	450	1.04	42.408	25.3534	25.7286
6	colon	450	1.04	46.3267	29.1603	29.0969
7	colon	450	1.04	49.3584	33.2148	32.6043
8	colon	450	1.04	51.4396	35.3181	33.4556
9	colon	450	1.04	54.763	37.6755	36.3053
10	colon	450	1.04	57.5573	40.7227	39.5534
12	colon	450	1.04	64.6012	46.1587	44.1072
14	colon	450	1.04	68.2172	51.2368	48.4795
15	colon	450	1.04	71.1663	53.5304	50.6642
16	colon	450	1.04	71.4146	55.5006	51.8591
18	colon	450	1.04	71.9302	58.4236	54.31
20	colon	450	1.04	72.3401	59.505	54.6718
1e-09	Lung	500	0.415	1.13325	0.988876	0.374944
1e-08	Lung	500	0.415	1.23755	1.10261	0.405881
2.5e-08	Lung	500	0.415	1.42374	1.231	0.47701
1e-07	Lung	500	0.415	1.97647	1.73534	0.614213
2e-07	Lung	500	0.415	2.26191	2.00861	0.687151
5e-07	Lung	500	0.415	2.50574	2.32723	0.816268
1e-06	Lung	500	0.415	2.7854	2.41223	0.930458
2e-06	Lung	500	0.415	2.93568	2.70934	0.898129
5e-06	Lung	500	0.415	3.08415	2.84735	0.963109
1e-05	Lung	500	0.415	3.07875	2.9317	0.995297
2e-05	Lung	500	0.415	3.09502	2.84011	0.998309
5e-05	Lung	500	0.415	3.12298	2.82949	1.02282
0.0001	Lung	500	0.415	3.19996	2.94663	0.977763
0.0002	Lung	500	0.415	3.21277	2.94689	1.02795
0.0005	Lung	500	0.415	3.10471	3.05323	0.975541
0.001	Lung	500	0.415	3.22236	2.92075	1.00595
0.002	Lung	500	0.415	3.01431	2.84021	0.946671
0.005	Lung	500	0.415	3.09323	2.93562	0.93852
0.01	Lung	500	0.415	3.08701	3.00322	0.963574
0.02	Lung	500	0.415	3.06244	3.00381	0.95494
0.03	Lung	500	0.415	3.18856	2.98215	0.982137
0.05	Lung	500	0.415	3.21658	3.0807	1.02288
0.07	Lung	500	0.415	3.40767	3.13917	1.1086
0.1	Lung	500	0.415	3.54894	3.27096	1.14484
0.15	Lung	500	0.415	3.85395	3.4121	1.17937
0.2	Lung	500	0.415	4.31924	3.59726	1.23507
0.3	Lung	500	0.415	4.99789	4.21289	1.37417
0.5	Lung	500	0.415	7.02405	5.6243	1.83371
0.7	Lung	500	0.415	9.25523	7.19939	2.32091
0.9	Lung	500	0.415	11.1185	8.63054	2.87323
1	Lung	500	0.415	10.5189	8.08716	2.59888
1.2	Lung	500	0.415	13.8777	11.0954	3.7951
1.5	Lung	500	0.415	16.8899	13.9965	4.68523
2	Lung	500	0.415	21.6404	18.2525	6.64819
3	Lung	500	0.415	28.1782	24.7088	10.5247
4	Lung	500	0.415	33.4028	30.8054	12.4315
5	Lung	500	0.415	39.5289	34.7972	17.0449
6	Lung	500	0.415	41.5406	40.4934	19.7607
7	Lung	500	0.415	45.9741	41.4132	24.1601
8	Lung	500	0.415	47.3714	44.3018	25.4632
9	Lung	500	0.415	49.9302	46.6786	26.5626
10	Lung	500	0.415	53.2345	50.9303	29.6035
12	Lung	500	0.415	60.6022	54.5634	33.6199
14	Lung	500	0.415	63.0928	60.6787	37.2595
15	Lung	500	0.415	67.8644	62.7712	39.3474
16	Lung	500	0.415	65.7031	65.7952	39.404
18	Lung	500	0.415	69.8305	65.3978	40.8885
20	Lung	500	0.415	68.2873	64.9962	42.3042
1e-09	Stomach	150	1.037	1.35989	0.659359	0.68364
1e-08	Stomach	150	1.037	1.50671	0.71774	0.780952
2.5e-08	Stomach	150	1.037	1.75586	0.828383	0.901255
1e-07	Stomach	150	1.037	2.38976	1.10697	1.25223
2e-07	Stomach	150	1.037	2.71258	1.27667	1.41436
5e-07	Stomach	150	1.037	3.23999	1.48496	1.70524
1e-06	Stomach	150	1.037	3.46048	1.61563	1.87788
2e-06	Stomach	150	1.037	3.69357	1.71412	2.01521
5e-06	Stomach	150	1.037	3.89235	1.80693	2.13422
1e-05	Stomach	150	1.037	3.84895	1.85034	2.20996
2e-05	Stomach	150	1.037	3.90676	1.88183	2.15663
5e-05	Stomach	150	1.037	3.9845	1.90698	2.17813
0.0001	Stomach	150	1.037	3.96658	1.91341	2.16259
0.0002	Stomach	150	1.037	4.04227	1.91606	2.20179
0.0005	Stomach	150	1.037	3.95255	1.93804	2.15344
0.001	Stomach	150	1.037	3.94433	1.95325	2.14399
0.002	Stomach	150	1.037	3.85509	1.95734	2.1194
0.005	Stomach	150	1.037	3.86275	1.95355	2.1425
0.01	Stomach	150	1.037	3.93674	1.98037	2.14706
0.02	Stomach	150	1.037	3.92786	1.99546	2.14634
0.03	Stomach	150	1.037	4.0007	2.0467	2.20384
0.05	Stomach	150	1.037	4.09454	2.10096	2.25274
0.07	Stomach	150	1.037	4.24683	2.15508	2.32833
0.1	Stomach	150	1.037	4.36923	2.24188	2.49342
0.15	Stomach	150	1.037	4.70325	2.35625	2.68029
0.2	Stomach	150	1.037	5.16401	2.48821	3.00347
0.3	Stomach	150	1.037	5.88322	2.64702	3.56637
0.5	Stomach	150	1.037	7.90038	3.16442	5.06004
0.7	Stomach	150	1.037	9.73303	3.70979	6.66001
0.9	Stomach	150	1.037	11.5332	4.21435	8.02092
1	Stomach	150	1.037	10.8603	3.72301	7.59625
1.2	Stomach	150	1.037	14.1663	5.22323	10.5683
1.5	Stomach	150	1.037	16.9908	6.61721	13.3546
2	Stomach	150	1.037	21.281	9.02241	17.4255
3	Stomach	150	1.037	28.3379	14.0095	24.568
4	Stomach	150	1.037	34.8103	17.737	29.6524
5	Stomach	150	1.037	39.3886	22.8705	35.433
6	Stomach	150	1.037	43.6842	25.939	38.9348
7	Stomach	150	1.037	47.093	30.3597	42.851
8	Stomach	150	1.037	48.8172	32.1703	44.7359
9	Stomach	150	1.037	52.1928	34.4077	47.6123
10	Stomach	150	1.037	55.0164	37.2384	51.384
12	Stomach	150	1.037	61.1991	42.5014	57.3634
14	Stomach	150	1.037	65.5717	47.3661	61.2402
15	Stomach	150	1.037	67.4169	50.0987	64.3018
16	Stomach	150	1.037	68.5027	51.8752	65.2144
18	Stomach	150	1.037	69.4368	54.9221	67.1802
20	Stomach	150	1.037	70.6627	56.0657	65.7019
1e-09	Gonad	35	1.041	2.6143	0.742031	0.291744
1e-08	Gonad	35	1.041	2.65653	0.777839	0.305775
2.5e-08	Gonad	35	1.041	2.87999	0.877838	0.329871
1e-07	Gonad	35	1.041	3.3722	1.12462	0.431787
2e-07	Gonad	35	1.041	3.61088	1.27424	0.48376
5e-07	Gonad	35	1.041	3.8819	1.46588	0.540254
1e-06	Gonad	35	1.041	4.02449	1.58162	0.573727
2e-06	Gonad	35	1.041	4.12116	1.65766	0.602329
5e-06	Gonad	35	1.041	4.15128	1.73803	0.600613
1e-05	Gonad	35	1.041	4.10276	1.75575	0.615493
2e-05	Gonad	35	1.041	4.04941	1.78511	0.615254
5e-05	Gonad	35	1.041	3.94502	1.77144	0.614189
0.0001	Gonad	35	1.041	3.86253	1.78184	0.611342
0.0002	Gonad	35	1.041	3.77076	1.78251	0.613059
0.0005	Gonad	35	1.041	3.64391	1.76601	0.601321
0.001	Gonad	35	1.041	3.59073	1.77029	0.589428
0.002	Gonad	35	1.041	3.52545	1.75548	0.573484
0.005	Gonad	35	1.041	3.49547	1.76512	0.573673
0.01	Gonad	35	1.041	3.48369	1.76773	0.571155
0.02	Gonad	35	1.041	3.61687	1.79976	0.566518
0.03	Gonad	35	1.041	3.81602	1.83353	0.57815
0.05	Gonad	35	1.041	4.23092	1.93548	0.600291
0.07	Gonad	35	1.041	4.60074	2.01788	0.60732
0.1	Gonad	35	1.041	5.29068	2.17556	0.635992
0.15	Gonad	35	1.041	6.39902	2.42041	0.671373
0.2	Gonad	35	1.041	7.45103	2.69114	0.751838
0.3	Gonad	35	1.041	9.53748	3.24368	0.83365
0.5	Gonad	35	1.041	13.4148	4.50553	1.10632
0.7	Gonad	35	1.041	16.6707	6.03448	1.50238
0.9	Gonad	35	1.041	19.5043	7.36384	1.90054
1	Gonad	35	1.041	20.6477	6.7724	1.62642
1.2	Gonad	35	1.041	23.2732	9.8102	2.70638
1.5	Gonad	35	1.041	26.6484	12.4639	3.78204
2	Gonad	35	1.041	30.9616	16.6607	5.83014
3	Gonad	35	1.041	37.7878	24.2307	10.3007
4	Gonad	35	1.041	44.9617	29.8963	12.7883
5	Gonad	35	1.041	48.6741	36.1164	18.2573
6	Gonad	35	1.041	52.8283	40.3555	20.7576
7	Gonad	35	1.041	54.5711	44.5344	25.3985
8	Gonad	35	1.041	56.8298	47.0034	27.1508
9	Gonad	35	1.041	60.4561	50.0083	29.4301
10	Gonad	35	1.041	63.9557	54.0107	31.74
12	Gonad	35	1.041	70.0604	60.6538	36.1598
14	Gonad	35	1.041	73.0542	65.6945	40.7446
15	Gonad	35	1.041	75.1209	68.8381	42.6062
16	Gonad	35	1.041	75.4816	70.3294	44.3952
18	Gonad	35	1.041	74.8628	72.5088	47.1193
20	Gonad	35	1.041	74.9878	73.6836	47.8554
1e-09	Bladder	50	1.04	1.3898	0.813589	0.241508
1e-08	Bladder	50	1.04	1.53424	0.897705	0.286541
2.5e-08	Bladder	50	1.04	1.83462	1.02454	0.306206
1e-07	Bladder	50	1.04	2.5193	1.36672	0.413973
2e-07	Bladder	50	1.04	2.9065	1.55874	0.435712
5e-07	Bladder	50	1.04	3.42706	1.82264	0.537487
1e-06	Bladder	50	1.04	3.74748	1.99202	0.578494
2e-06	Bladder	50	1.04	3.96537	2.1195	0.606906
5e-06	Bladder	50	1.04	4.1757	2.22626	0.677354
1e-05	Bladder	50	1.04	4.21791	2.27639	0.669738
2e-05	Bladder	50	1.04	4.25653	2.31815	0.696241
5e-05	Bladder	50	1.04	4.35723	2.34721	0.706637
0.0001	Bladder	50	1.04	4.3251	2.36944	0.726992
0.0002	Bladder	50	1.04	4.3432	2.38889	0.688198
0.0005	Bladder	50	1.04	4.27894	2.4033	0.671119
0.001	Bladder	50	1.04	4.28346	2.412	0.653967
0.002	Bladder	50	1.04	4.25763	2.40577	0.681693
0.005	Bladder	50	1.04	4.28021	2.45249	0.690913
0.01	Bladder	50	1.04	4.36034	2.44593	0.719157
0.02	Bladder	50	1.04	4.29889	2.48848	0.699401
0.03	Bladder	50	1.04	4.36935	2.54117	0.723342
0.05	Bladder	50	1.04	4.48889	2.63263	0.732854
0.07	Bladder	50	1.04	4.5984	2.68345	0.761753
0.1	Bladder	50	1.04	4.81335	2.79839	0.782091
0.15	Bladder	50	1.04	5.24822	2.94296	0.832226
0.2	Bladder	50	1.04	5.62146	3.12813	0.913287
0.3	Bladder	50	1.04	6.44681	3.38211	0.994072
0.5	Bladder	50	1.04	8.79154	4.03683	1.19051
0.7	Bladder	50	1.04	10.7112	4.76667	1.49593
0.9	Bladder	50	1.04	12.6536	5.51616	1.74327
1	Bladder	50	1.04	12.1894	4.83525	1.46057
1.2	Bladder	50	1.04	15.6343	6.94162	2.28533
1.5	Bladder	50	1.04	19.0911	8.70142	3.16231
2	Bladder	50	1.04	23.8969	11.7601	4.78791
3	Bladder	50	1.04	31.8804	17.8668	8.73816
4	Bladder	50	1.04	38.6877	22.4096	10.5245
5	Bladder	50	1.04	42.5615	28.0371	15.4948
6	Bladder	50	1.04	47.4821	31.8135	18.1612
7	Bladder	50	1.04	51.7353	36.0822	23.2525
8	Bladder	50	1.04	54.331	37.9716	23.6892
9	Bladder	50	1.04	56.3077	40.7861	26.1305
10	Bladder	50	1.04	61.4683	44.6063	28.6184
12	Bladder	50	1.04	67.2119	49.9164	32.8547
14	Bladder	50	1.04	71.4985	55.5471	38.2189
15	Bladder	50	1.04	73.4189	57.9261	41.2107
16	Bladder	50	1.04	74.319	59.67	41.1572
18	Bladder	50	1.04	74.4952	62.8329	45.2706
20	Bladder	50	1.04	75.8475	63.9419	46.4814
1e-09	Oesophagus	40	1.037	1.20691	0.919199	0.396206
1e-08	Oesophagus	40	1.037	1.21418	1.04343	0.422013
2.5e-08	Oesophagus	40	1.037	1.43991	1.19514	0.508738
1e-07	Oesophagus	40	1.037	1.95869	1.65697	0.698809
2e-07	Oesophagus	40	1.037	2.27186	1.89449	0.759198
5e-07	Oesophagus	40	1.037	2.68217	2.27245	0.903951
1e-06	Oesophagus	40	1.037	2.83671	2.51262	0.985621
2e-06	Oesophagus	40	1.037	3.09169	2.67906	1.06097
5e-06	Oesophagus	40	1.037	3.14064	2.81879	1.0771
1e-05	Oesophagus	40	1.037	3.37201	2.89965	1.17922
2e-05	Oesophagus	40	1.037	3.50672	2.95911	1.21352
5e-05	Oesophagus	40	1.037	3.34712	3.02545	1.13008
0.0001	Oesophagus	40	1.037	3.32707	3.04428	1.13476
0.0002	Oesophagus	40	1.037	3.29449	3.01439	1.18644
0.0005	Oesophagus	40	1.037	3.4355	3.08676	1.11211
0.001	Oesophagus	40	1.037	3.26282	3.06527	1.17648
0.002	Oesophagus	40	1.037	3.29414	3.0798	1.09899
0.005	Oesophagus	40	1.037	3.24913	3.09031	1.12538
0.01	Oesophagus	40	1.037	3.38145	3.15632	1.15573
0.02	Oesophagus	40	1.037	3.4008	3.19119	1.19283
0.03	Oesophagus	40	1.037	3.32442	3.25424	1.15828
0.05	Oesophagus	40	1.037	3.36554	3.33475	1.23134
0.07	Oesophagus	40	1.037	3.58917	3.46765	1.15573
0.1	Oesophagus	40	1.037	3.77429	3.55866	1.34208
0.15	Oesophagus	40	1.037	4.21975	3.74499	1.30324
0.2	Oesophagus	40	1.037	4.58448	3.9113	1.53778
0.3	Oesophagus	40	1.037	5.14949	4.27632	1.78443
0.5	Oesophagus	40	1.037	6.91004	5.18199	2.14292
0.7	Oesophagus	40	1.037	8.62369	6.485	2.77619
0.9	Oesophagus	40	1.037	10.3203	7.66067	3.35736
1	Oesophagus	40	1.037	9.79214	6.85088	3.07513
1.2	Oesophagus	40	1.037	12.1838	9.83727	3.97827
1.5	Oesophagus	40	1.037	15.1698	12.3461	5.32791
2	Oesophagus	40	1.037	18.8958	16.265	6.73656
3	Oesophagus	40	1.037	27.2312	23.1326	11.8456
4	Oesophagus	40	1.037	31.9929	28.93	14.065
5	Oesophagus	40	1.037	37.1265	33.9288	18.3297
6	Oesophagus	40	1.037	40.8919	38.3319	21.5909
7	Oesophagus	40	1.037	44.2331	41.814	26.6537
8	Oesophagus	40	1.037	46.4358	43.9056	27.2691
9	Oesophagus	40	1.037	50.6692	46.6527	30.6311
10	Oesophagus	40	1.037	50.3559	50.0323	32.446
12	Oesophagus	40	1.037	57.2402	56.1618	37.3599
14	Oesophagus	40	1.037	64.338	59.8228	41.809
15	Oesophagus	40	1.037	65.6447	62.6989	43.7486
16	Oesophagus	40	1.037	69.4191	63.2401	42.8157
18	Oesophagus	40	1.037	65.5435	65.2645	47.5091
20	Oesophagus	40	1.037	68.6063	66.1207	47.702
1e-09	Liver	1800	1.06	1.29653	0.801071	0.198701
1e-08	Liver	1800	1.06	1.4328	0.877704	0.208022
2.5e-08	Liver	1800	1.06	1.67582	1.02222	0.235225
1e-07	Liver	1800	1.06	2.23948	1.36823	0.314545
2e-07	Liver	1800	1.06	2.55927	1.56852	0.359462
5e-07	Liver	1800	1.06	2.9772	1.83977	0.41625
1e-06	Liver	1800	1.06	3.20947	1.9985	0.448622
2e-06	Liver	1800	1.06	3.39919	2.12974	0.478659
5e-06	Liver	1800	1.06	3.56217	2.24751	0.502841
1e-05	Liver	1800	1.06	3.62244	2.29468	0.511021
2e-05	Liver	1800	1.06	3.64597	2.32675	0.517056
5e-05	Liver	1800	1.06	3.66093	2.3519	0.523074
0.0001	Liver	1800	1.06	3.66941	2.363	0.52425
0.0002	Liver	1800	1.06	3.66057	2.3689	0.527147
0.0005	Liver	1800	1.06	3.64711	2.37146	0.52693
0.001	Liver	1800	1.06	3.6307	2.37459	0.524398
0.002	Liver	1800	1.06	3.6152	2.37437	0.52513
0.005	Liver	1800	1.06	3.59469	2.37793	0.525736
0.01	Liver	1800	1.06	3.59597	2.38815	0.524808
0.02	Liver	1800	1.06	3.62706	2.41715	0.53299
0.03	Liver	1800	1.06	3.67411	2.4528	0.539796
0.05	Liver	1800	1.06	3.79675	2.52645	0.557951
0.07	Liver	1800	1.06	3.91423	2.58776	0.57503
0.1	Liver	1800	1.06	4.10294	2.69501	0.599173
0.15	Liver	1800	1.06	4.43888	2.85679	0.633349
0.2	Liver	1800	1.06	4.80702	3.03598	0.672824
0.3	Liver	1800	1.06	5.51211	3.35114	0.745018
0.5	Liver	1800	1.06	7.22493	4.19097	0.912463
0.7	Liver	1800	1.06	8.91799	5.11687	1.14188
0.9	Liver	1800	1.06	10.3984	5.9179	1.34072
1	Liver	1800	1.06	9.94026	5.33984	1.1557
1.2	Liver	1800	1.06	12.7809	7.39679	1.75577
1.5	Liver	1800	1.06	15.3817	9.21402	2.34179
2	Liver	1800	1.06	19.1518	12.107	3.47485
3	Liver	1800	1.06	25.6609	17.626	6.16942
4	Liver	1800	1.06	31.291	22.0131	7.79325
5	Liver	1800	1.06	35.8811	26.8361	11.5533
6	Liver	1800	1.06	39.9197	30.429	13.5962
7	Liver	1800	1.06	43.0279	34.282	17.3336
8	Liver	1800	1.06	45.1396	36.1906	18.4618
9	Liver	1800	1.06	48.0131	38.7074	20.3104
10	Liver	1800	1.06	51.1869	41.6933	22.391
12	Liver	1800	1.06	57.0584	47.1705	25.7287
14	Liver	1800	1.06	61.1204	51.9242	30.0754
15	Liver	1800	1.06	63.4765	54.4127	31.5496
16	Liver	1800	1.06	64.5415	56.0051	33.6012
18	Liver	1800	1.06	66.0819	58.7265	36.776
20	Liver	1800	1.06	66.6444	59.5822	37.9916
1e-09	Thyriod	20	1.051	1.8494	0.621398	0.585154
1e-08	Thyriod	20	1.051	2.03801	0.674244	0.624802
2.5e-08	Thyriod	20	1.051	2.38721	0.796093	0.739623
1e-07	Thyriod	20	1.051	3.20487	1.06902	0.966475
2e-07	Thyriod	20	1.051	3.67016	1.2253	1.08818
5e-07	Thyriod	20	1.051	4.12326	1.45576	1.23741
1e-06	Thyriod	20	1.051	4.346	1.58097	1.33475
2e-06	Thyriod	20	1.051	4.52626	1.68817	1.40011
5e-06	Thyriod	20	1.051	4.58457	1.78189	1.43225
1e-05	Thyriod	20	1.051	4.55099	1.82296	1.45624
2e-05	Thyriod	20	1.051	4.43452	1.84928	1.46894
5e-05	Thyriod	20	1.051	4.36183	1.8757	1.44385
0.0001	Thyriod	20	1.051	4.25907	1.87535	1.43981
0.0002	Thyriod	20	1.051	4.19352	1.90121	1.42002
0.0005	Thyriod	20	1.051	4.07193	1.8972	1.37384
0.001	Thyriod	20	1.051	3.93698	1.88844	1.35522
0.002	Thyriod	20	1.051	3.83047	1.91291	1.35085
0.005	Thyriod	20	1.051	3.74183	1.90029	1.3508
0.01	Thyriod	20	1.051	3.76502	1.9089	1.32193
0.02	Thyriod	20	1.051	3.87439	1.94154	1.29375
0.03	Thyriod	20	1.051	4.01568	1.96759	1.35435
0.05	Thyriod	20	1.051	4.37878	2.0216	1.36777
0.07	Thyriod	20	1.051	4.842	2.06671	1.44119
0.1	Thyriod	20	1.051	5.55339	2.13662	1.56746
0.15	Thyriod	20	1.051	6.84014	2.22837	1.74424
0.2	Thyriod	20	1.051	8.08586	2.33578	1.99897
0.3	Thyriod	20	1.051	10.3969	2.51406	2.42314
0.5	Thyriod	20	1.051	15.2047	3.05969	3.50452
0.7	Thyriod	20	1.051	18.6487	3.79611	4.50201
0.9	Thyriod	20	1.051	21.8572	4.50711	5.41804
1	Thyriod	20	1.051	23.0668	3.95131	5.29098
1.2	Thyriod	20	1.051	26.0364	5.98131	6.87915
1.5	Thyriod	20	1.051	29.7409	7.84818	8.42156
2	Thyriod	20	1.051	34.4123	10.9548	10.8598
3	Thyriod	20	1.051	41.4068	16.9463	15.4771
4	Thyriod	20	1.051	49.5014	21.4246	18.9403
5	Thyriod	20	1.051	52.4433	26.8143	23.1157
6	Thyriod	20	1.051	56.8686	30.4661	25.6613
7	Thyriod	20	1.051	58.1076	34.6495	29.5123
8	Thyriod	20	1.051	60.0781	36.0583	30.5798
9	Thyriod	20	1.051	63.8875	38.9714	33.2498
10	Thyriod	20	1.051	67.5209	42.2593	35.6646
12	Thyriod	20	1.051	73.7036	47.5557	40.1006
14	Thyriod	20	1.051	76.9895	52.0884	43.8622
15	Thyriod	20	1.051	79.8163	54.6902	45.9775
16	Thyriod	20	1.051	79.4924	56.2153	47.4105
18	Thyriod	20	1.051	78.9417	58.8245	49.1303
20	Thyriod	20	1.051	78.9118	59.887	49.6733
1e-09	Brain	1450	1.041	0.54633	0.697952	0.817866
1e-08	Brain	1450	1.041	0.589037	0.768583	0.927595
2.5e-08	Brain	1450	1.041	0.687491	0.904453	1.10643
1e-07	Brain	1450	1.041	0.918635	1.22257	1.51003
2e-07	Brain	1450	1.041	1.05126	1.40083	1.73473
5e-07	Brain	1450	1.041	1.2273	1.63072	2.02133
1e-06	Brain	1450	1.041	1.32025	1.75394	2.17488
2e-06	Brain	1450	1.041	1.39203	1.84881	2.29241
5e-06	Brain	1450	1.041	1.45404	1.91669	2.36415
1e-05	Brain	1450	1.041	1.46243	1.93353	2.3827
2e-05	Brain	1450	1.041	1.46799	1.93686	2.38087
5e-05	Brain	1450	1.041	1.46229	1.92369	2.35996
0.0001	Brain	1450	1.041	1.4553	1.90631	2.33535
0.0002	Brain	1450	1.041	1.44061	1.887	2.30917
0.0005	Brain	1450	1.041	1.42267	1.85505	2.27205
0.001	Brain	1450	1.041	1.40122	1.82994	2.23373
0.002	Brain	1450	1.041	1.38863	1.80414	2.20348
0.005	Brain	1450	1.041	1.36834	1.77491	2.16794
0.01	Brain	1450	1.041	1.36641	1.76687	2.16334
0.02	Brain	1450	1.041	1.3761	1.78028	2.1956
0.03	Brain	1450	1.041	1.39758	1.80904	2.23753
0.05	Brain	1450	1.041	1.46051	1.89625	2.37172
0.07	Brain	1450	1.041	1.52439	1.98476	2.50509
0.1	Brain	1450	1.041	1.64006	2.14767	2.74101
0.15	Brain	1450	1.041	1.85019	2.43909	3.14443
0.2	Brain	1450	1.041	2.08737	2.77577	3.59403
0.3	Brain	1450	1.041	2.568	3.44337	4.46405
0.5	Brain	1450	1.041	3.75575	5.0518	6.51874
0.7	Brain	1450	1.041	5.04286	6.66933	8.46835
0.9	Brain	1450	1.041	6.17725	8.09915	10.1817
1	Brain	1450	1.041	5.77708	7.80224	9.88729
1.2	Brain	1450	1.041	8.12735	10.445	12.9384
1.5	Brain	1450	1.041	10.3034	12.919	15.778
2	Brain	1450	1.041	13.6003	16.5482	19.8049
3	Brain	1450	1.041	19.473	22.7517	26.5058
4	Brain	1450	1.041	23.7395	27.6238	32.2355
5	Brain	1450	1.041	28.7265	32.3731	36.6939
6	Brain	1450	1.041	31.7864	35.6573	40.2107
7	Brain	1450	1.041	35.5811	39.1039	43.3417
8	Brain	1450	1.041	37.2898	40.9063	45.3681
9	Brain	1450	1.041	39.7802	43.5217	48.0291
10	Brain	1450	1.041	42.6339	46.4718	51.1395
12	Brain	1450	1.041	47.2233	51.3302	56.3473
14	Brain	1450	1.041	51.0771	55.0822	60.0242
15	Brain	1450	1.041	53.0025	57.0746	62.1773
16	Brain	1450	1.041	54.2692	58.187	63.1863
18	Brain	1450	1.041	55.984	59.6256	64.4075
20	Brain	1450	1.041	56.5253	59.935	64.6054
1e-09	Skin	3300	1.089	2.54125	2.48295	1.29563
1e-08	Skin	3300	1.089	1.46556	1.44911	0.710938
2.5e-08	Skin	3300	1.089	1.32466	1.31616	0.631396
1e-07	Skin	3300	1.089	1.32866	1.34449	0.620921
2e-07	Skin	3300	1.089	1.36105	1.38519	0.643257
5e-07	Skin	3300	1.089	1.41801	1.4514	0.659881
1e-06	Skin	3300	1.089	1.44116	1.47839	0.66882
2e-06	Skin	3300	1.089	1.44838	1.49502	0.670796
5e-06	Skin	3300	1.089	1.44149	1.48862	0.666666
1e-05	Skin	3300	1.089	1.41849	1.46656	0.649555
2e-05	Skin	3300	1.089	1.38968	1.43931	0.63344
5e-05	Skin	3300	1.089	1.34625	1.39655	0.611702
0.0001	Skin	3300	1.089	1.31598	1.3669	0.596542
0.0002	Skin	3300	1.089	1.28667	1.33736	0.583406
0.0005	Skin	3300	1.089	1.26174	1.31143	0.571781
0.001	Skin	3300	1.089	1.25491	1.30725	0.570594
0.002	Skin	3300	1.089	1.28652	1.32918	0.590958
0.005	Skin	3300	1.089	1.4193	1.44918	0.670331
0.01	Skin	3300	1.089	1.66314	1.67939	0.812929
0.02	Skin	3300	1.089	2.14553	2.13241	1.1005
0.03	Skin	3300	1.089	2.59575	2.55558	1.35831
0.05	Skin	3300	1.089	3.38746	3.29713	1.82629
0.07	Skin	3300	1.089	4.11058	3.9799	2.25666
0.1	Skin	3300	1.089	5.0156	4.82578	2.79365
0.15	Skin	3300	1.089	6.32699	6.06711	3.59197
0.2	Skin	3300	1.089	7.38258	7.06741	4.23933
0.3	Skin	3300	1.089	9.28233	8.85921	5.43261
0.5	Skin	3300	1.089	11.9637	11.4202	7.16681
0.7	Skin	3300	1.089	14.4042	13.7606	8.86501
0.9	Skin	3300	1.089	16.6719	15.8975	10.3697
1	Skin	3300	1.089	19.1594	18.2225	11.7163
1.2	Skin	3300	1.089	19.2944	18.471	12.3527
1.5	Skin	3300	1.089	21.6343	20.7048	14.1277
2	Skin	3300	1.089	24.9474	23.8828	16.7314
3	Skin	3300	1.089	29.2584	28.0745	20.574
4	Skin	3300	1.089	32.7403	31.2884	23.2618
5	Skin	3300	1.089	33.3573	32.0743	24.986
6	Skin	3300	1.089	34.3573	33.1564	26.0162
7	Skin	3300	1.089	34.3604	33.3155	27.0457
8	Skin	3300	1.089	35.2984	34.2705	27.8043
9	Skin	3300	1.089	36.9792	35.9663	29.3677
10	Skin	3300	1.089	38.8408	37.8661	31.0587
12	Skin	3300	1.089	42.4607	41.4714	33.9117
14	Skin	3300	1.089	43.837	42.9034	35.5498
15	Skin	3300	1.089	45.4228	44.5244	36.9344
16	Skin	3300	1.089	45.5985	44.6416	37.2311
18	Skin	3300	1.089	45.4056	44.5637	37.6315
20	Skin	3300	1.089	45.2308	44.5769	37.8546
1e-09	Adrenals	14	1.036	0.725899	1.4463	0.343458
1e-08	Adrenals	14	1.036	0.781228	1.62148	0.361841
2.5e-08	Adrenals	14	1.036	0.870592	1.91395	0.426865
1e-07	Adrenals	14	1.036	1.13987	2.61056	0.54107
2e-07	Adrenals	14	1.036	1.29713	3.00736	0.59374
5e-07	Adrenals	14	1.036	1.44352	3.55649	0.737827
1e-06	Adrenals	14	1.036	1.54698	3.88265	0.791328
2e-06	Adrenals	14	1.036	1.67993	4.14576	0.835095
5e-06	Adrenals	14	1.036	1.71609	4.38133	0.891671
1e-05	Adrenals	14	1.036	1.77945	4.48277	0.920788
2e-05	Adrenals	14	1.036	1.79515	4.52941	0.901038
5e-05	Adrenals	14	1.036	1.87493	4.55161	0.931997
0.0001	Adrenals	14	1.036	1.86149	4.59189	0.938354
0.0002	Adrenals	14	1.036	1.84639	4.59616	0.952558
0.0005	Adrenals	14	1.036	1.8834	4.60521	0.969773
0.001	Adrenals	14	1.036	1.8649	4.59023	0.933288
0.002	Adrenals	14	1.036	1.92631	4.58884	0.938208
0.005	Adrenals	14	1.036	1.88085	4.56518	0.951473
0.01	Adrenals	14	1.036	1.87962	4.59986	0.939007
0.02	Adrenals	14	1.036	1.93186	4.6326	0.978194
0.03	Adrenals	14	1.036	1.98092	4.67433	1.00111
0.05	Adrenals	14	1.036	1.9936	4.77875	0.990807
0.07	Adrenals	14	1.036	2.03849	4.8773	1.02483
0.1	Adrenals	14	1.036	2.13006	5.06571	1.07214
0.15	Adrenals	14	1.036	2.21811	5.37986	1.13006
0.2	Adrenals	14	1.036	2.30853	5.72148	1.18236
0.3	Adrenals	14	1.036	2.47264	6.44315	1.29866
0.5	Adrenals	14	1.036	2.81526	8.54433	1.52872
0.7	Adrenals	14	1.036	3.14407	10.6604	1.80078
0.9	Adrenals	14	1.036	3.52872	12.5721	2.04747
1	Adrenals	14	1.036	3.12409	11.7757	1.80604
1.2	Adrenals	14	1.036	4.11678	15.745	2.48616
1.5	Adrenals	14	1.036	5.12577	19.1287	3.24771
2	Adrenals	14	1.036	7.04998	23.9415	4.4875
3	Adrenals	14	1.036	11.2679	31.667	7.48733
4	Adrenals	14	1.036	14.2877	38.7078	9.53034
5	Adrenals	14	1.036	19.2404	43.1642	13.1998
6	Adrenals	14	1.036	22.2422	47.8269	15.4336
7	Adrenals	14	1.036	26.7559	50.6189	19.1196
8	Adrenals	14	1.036	28.4242	53.0737	20.1757
9	Adrenals	14	1.036	30.8585	56.2581	22.1792
10	Adrenals	14	1.036	33.2403	59.5574	24.0285
12	Adrenals	14	1.036	38.3247	66.3966	27.4761
14	Adrenals	14	1.036	43.1821	70.2872	31.3595
15	Adrenals	14	1.036	44.9699	72.9491	32.9844
16	Adrenals	14	1.036	47.2479	73.5114	34.8082
18	Adrenals	14	1.036	50.6207	74.6463	37.9535
20	Adrenals	14	1.036	52.1277	75.2344	38.9324
1e-09	Salivary	85	1.03	0.960939	0.596296	1.19105
1e-08	Salivary	85	1.03	1.00036	0.629003	1.30842
2.5e-08	Salivary	85	1.03	1.13008	0.725028	1.46478
1e-07	Salivary	85	1.03	1.41987	0.960003	1.87738
2e-07	Salivary	85	1.03	1.58636	1.09309	2.04298
5e-07	Salivary	85	1.03	1.78258	1.27126	2.23532
1e-06	Salivary	85	1.03	1.8826	1.3585	2.29844
2e-06	Salivary	85	1.03	1.96374	1.42206	2.34454
5e-06	Salivary	85	1.03	1.9806	1.46943	2.3393
1e-05	Salivary	85	1.03	1.99514	1.47558	2.3273
2e-05	Salivary	85	1.03	1.99155	1.46955	2.25829
5e-05	Salivary	85	1.03	1.96931	1.45157	2.19494
0.0001	Salivary	85	1.03	1.93258	1.43437	2.14626
0.0002	Salivary	85	1.03	1.89324	1.41866	2.08146
0.0005	Salivary	85	1.03	1.84976	1.39107	2.01537
0.001	Salivary	85	1.03	1.82306	1.37001	1.97336
0.002	Salivary	85	1.03	1.78777	1.34953	1.9105
0.005	Salivary	85	1.03	1.75384	1.35039	1.94266
0.01	Salivary	85	1.03	1.7431	1.36719	2.00446
0.02	Salivary	85	1.03	1.78211	1.42316	2.19023
0.03	Salivary	85	1.03	1.81528	1.5004	2.3838
0.05	Salivary	85	1.03	1.97739	1.66057	2.80405
0.07	Salivary	85	1.03	2.12744	1.84407	3.21425
0.1	Salivary	85	1.03	2.38206	2.14267	3.8095
0.15	Salivary	85	1.03	2.87482	2.66469	4.75183
0.2	Salivary	85	1.03	3.43584	3.23225	5.59019
0.3	Salivary	85	1.03	4.52398	4.32571	7.08424
0.5	Salivary	85	1.03	6.98954	6.67776	9.75275
0.7	Salivary	85	1.03	9.37629	8.95916	11.855
0.9	Salivary	85	1.03	11.5261	10.9291	13.8772
1	Salivary	85	1.03	11.5394	10.7861	15.1379
1.2	Salivary	85	1.03	14.8087	14.0852	16.477
1.5	Salivary	85	1.03	17.9988	17.1556	18.8439
2	Salivary	85	1.03	22.4721	21.5913	22.3032
3	Salivary	85	1.03	29.8505	29.022	28.246
4	Salivary	85	1.03	36.0553	35.4761	34.0974
5	Salivary	85	1.03	40.5215	39.9498	37.7174
6	Salivary	85	1.03	44.5251	43.6643	41.2378
7	Salivary	85	1.03	47.3401	46.7506	43.3864
8	Salivary	85	1.03	49.2875	49.6144	45.9398
9	Salivary	85	1.03	52.764	52.2426	48.7702
10	Salivary	85	1.03	55.955	55.5437	51.4687
12	Salivary	85	1.03	61.4508	61.2974	56.775
14	Salivary	85	1.03	64.8017	65.0072	60.2395
15	Salivary	85	1.03	67.0056	67.4472	61.8647
16	Salivary	85	1.03	67.3282	68.2808	62.7481
18	Salivary	85	1.03	68.3674	69.8476	63.8647
20	Salivary	85	1.03	68.9699	70.1369	64.2167
1e-09	Heart	330	1.051	1.33854	0.740873	0.424155
1e-08	Heart	330	1.051	1.49682	0.818842	0.451708
2.5e-08	Heart	330	1.051	1.77948	0.956149	0.521457
1e-07	Heart	330	1.051	2.43478	1.29131	0.702189
2e-07	Heart	330	1.051	2.80107	1.48759	0.808803
5e-07	Heart	330	1.051	3.2992	1.75539	0.947628
1e-06	Heart	330	1.051	3.5752	1.91135	1.02218
2e-06	Heart	330	1.051	3.81181	2.04558	1.09252
5e-06	Heart	330	1.051	3.99856	2.17344	1.15678
1e-05	Heart	330	1.051	4.0663	2.22389	1.17668
2e-05	Heart	330	1.051	4.10878	2.26083	1.19278
5e-05	Heart	330	1.051	4.12961	2.29904	1.20597
0.0001	Heart	330	1.051	4.13397	2.31953	1.21305
0.0002	Heart	330	1.051	4.13363	2.33313	1.2171
0.0005	Heart	330	1.051	4.1154	2.35274	1.21633
0.001	Heart	330	1.051	4.0832	2.36314	1.21023
0.002	Heart	330	1.051	4.06569	2.37356	1.21299
0.005	Heart	330	1.051	4.03836	2.39115	1.21452
0.01	Heart	330	1.051	4.03012	2.41015	1.21254
0.02	Heart	330	1.051	4.06095	2.45418	1.23716
0.03	Heart	330	1.051	4.12465	2.49235	1.25101
0.05	Heart	330	1.051	4.24972	2.57729	1.28957
0.07	Heart	330	1.051	4.34397	2.6409	1.3323
0.1	Heart	330	1.051	4.57845	2.74559	1.39021
0.15	Heart	330	1.051	4.95253	2.89681	1.49195
0.2	Heart	330	1.051	5.36726	3.05835	1.62247
0.3	Heart	330	1.051	6.2182	3.31843	1.86653
0.5	Heart	330	1.051	8.32204	4.0394	2.49722
0.7	Heart	330	1.051	10.3795	4.91989	3.2892
0.9	Heart	330	1.051	12.1946	5.69794	4.00876
1	Heart	330	1.051	11.8199	5.02867	3.58218
1.2	Heart	330	1.051	15.1308	7.19412	5.34919
1.5	Heart	330	1.051	18.1693	9.11534	6.97832
2	Heart	330	1.051	22.4607	12.2331	9.74582
3	Heart	330	1.051	29.7129	18.1587	15.1309
4	Heart	330	1.051	36.1847	22.7093	18.7571
5	Heart	330	1.051	40.7816	27.9153	24.1271
6	Heart	330	1.051	45.1492	31.6573	27.3255
7	Heart	330	1.051	48.0011	35.7097	31.5842
8	Heart	330	1.051	50.0401	37.5021	33.2249
9	Heart	330	1.051	53.2414	40.1583	35.7052
10	Heart	330	1.051	56.6874	43.2511	38.5754
12	Heart	330	1.051	62.8347	48.7423	43.2481
14	Heart	330	1.051	66.8492	53.5558	47.9409
15	Heart	330	1.051	69.4944	56.0896	49.9396
16	Heart	330	1.051	70.235	57.6243	51.8604
18	Heart	330	1.051	71.4436	60.2772	54.4484
20	Heart	330	1.051	71.9003	61.1112	55.186
1e-09	Kidney	310	1.053	0.836	1.44201	0.404113
1e-08	Kidney	310	1.053	0.881794	1.61158	0.428494
2.5e-08	Kidney	310	1.053	0.995004	1.88995	0.49108
1e-07	Kidney	310	1.053	1.26326	2.56195	0.657322
2e-07	Kidney	310	1.053	1.41379	2.95162	0.755093
5e-07	Kidney	310	1.053	1.61354	3.47882	0.881061
1e-06	Kidney	310	1.053	1.73369	3.78016	0.95033
2e-06	Kidney	310	1.053	1.83054	4.02834	1.01692
5e-06	Kidney	310	1.053	1.91912	4.25192	1.06945
1e-05	Kidney	310	1.053	1.95373	4.33727	1.09086
2e-05	Kidney	310	1.053	1.9892	4.38682	1.09691
5e-05	Kidney	310	1.053	2.0124	4.41624	1.11824
0.0001	Kidney	310	1.053	2.02615	4.42841	1.11959
0.0002	Kidney	310	1.053	2.03618	4.42368	1.12474
0.0005	Kidney	310	1.053	2.05267	4.40774	1.12134
0.001	Kidney	310	1.053	2.05548	4.39381	1.11983
0.002	Kidney	310	1.053	2.05314	4.37512	1.12063
0.005	Kidney	310	1.053	2.06459	4.34987	1.12515
0.01	Kidney	310	1.053	2.07067	4.35235	1.12106
0.02	Kidney	310	1.053	2.10956	4.37657	1.14118
0.03	Kidney	310	1.053	2.13721	4.42244	1.14693
0.05	Kidney	310	1.053	2.19089	4.53636	1.18676
0.07	Kidney	310	1.053	2.23212	4.64118	1.21686
0.1	Kidney	310	1.053	2.313	4.83882	1.27006
0.15	Kidney	310	1.053	2.40346	5.17732	1.34403
0.2	Kidney	310	1.053	2.50699	5.57747	1.43784
0.3	Kidney	310	1.053	2.66723	6.37027	1.6041
0.5	Kidney	310	1.053	3.04971	8.52577	2.06004
0.7	Kidney	310	1.053	3.51468	10.7258	2.57522
0.9	Kidney	310	1.053	3.913	12.6301	3.02306
1	Kidney	310	1.053	3.51782	11.8501	2.76898
1.2	Kidney	310	1.053	4.7028	15.7837	3.90439
1.5	Kidney	310	1.053	5.89486	19.1317	4.94173
2	Kidney	310	1.053	8.02055	23.8055	6.71258
3	Kidney	310	1.053	12.6059	31.3792	10.2383
4	Kidney	310	1.053	15.9174	38.331	12.7571
5	Kidney	310	1.053	20.9009	42.7099	16.6863
6	Kidney	310	1.053	24.188	47.1775	19.1733
7	Kidney	310	1.053	28.4317	50.0247	22.7641
8	Kidney	310	1.053	30.1389	52.3944	23.8929
9	Kidney	310	1.053	32.6124	55.4492	26.0345
10	Kidney	310	1.053	35.3976	58.9049	28.3466
12	Kidney	310	1.053	40.3251	65.7771	32.1748
14	Kidney	310	1.053	45.264	69.6919	36.3816
15	Kidney	310	1.053	47.4847	72.527	38.0745
16	Kidney	310	1.053	49.3508	73.2627	39.8628
18	Kidney	310	1.053	52.3649	74.3956	42.3645
20	Kidney	310	1.053	53.4695	74.6728	43.5268
1e-09	Lymph	178.4	1.032	1.39171	0.931553	0.423912
1e-08	Lymph	178.4	1.032	1.53544	1.01145	0.456512
2.5e-08	Lymph	178.4	1.032	1.78212	1.1728	0.525934
1e-07	Lymph	178.4	1.032	2.37135	1.54934	0.701121
2e-07	Lymph	178.4	1.032	2.67078	1.76298	0.806512
5e-07	Lymph	178.4	1.032	3.06798	2.03789	0.937558
1e-06	Lymph	178.4	1.032	3.26214	2.1931	1.00824
2e-06	Lymph	178.4	1.032	3.43872	2.31367	1.07381
5e-06	Lymph	178.4	1.032	3.5502	2.41499	1.11924
1e-05	Lymph	178.4	1.032	3.56463	2.44858	1.13487
2e-05	Lymph	178.4	1.032	3.57071	2.46126	1.14846
5e-05	Lymph	178.4	1.032	3.55434	2.46302	1.14082
0.0001	Lymph	178.4	1.032	3.52805	2.4562	1.14282
0.0002	Lymph	178.4	1.032	3.49497	2.44373	1.12002
0.0005	Lymph	178.4	1.032	3.45346	2.43185	1.11985
0.001	Lymph	178.4	1.032	3.407	2.41461	1.11393
0.002	Lymph	178.4	1.032	3.36966	2.40217	1.09953
0.005	Lymph	178.4	1.032	3.35019	2.39541	1.0909
0.01	Lymph	178.4	1.032	3.37013	2.40999	1.09378
0.02	Lymph	178.4	1.032	3.45764	2.45284	1.11117
0.03	Lymph	178.4	1.032	3.55458	2.50885	1.13053
0.05	Lymph	178.4	1.032	3.80892	2.63708	1.17627
0.07	Lymph	178.4	1.032	4.03863	2.75764	1.22433
0.1	Lymph	178.4	1.032	4.41874	2.95241	1.32567
0.15	Lymph	178.4	1.032	5.05321	3.27004	1.47647
0.2	Lymph	178.4	1.032	5.6915	3.61357	1.65304
0.3	Lymph	178.4	1.032	6.90953	4.23563	2.01055
0.5	Lymph	178.4	1.032	9.51514	5.66291	2.87244
0.7	Lymph	178.4	1.032	11.7844	7.04239	3.82619
0.9	Lymph	178.4	1.032	13.8693	8.28332	4.68763
1	Lymph	178.4	1.032	14.1367	8.04787	4.41315
1.2	Lymph	178.4	1.032	16.9601	10.3324	6.22927
1.5	Lymph	178.4	1.032	19.9277	12.5578	7.93098
2	Lymph	178.4	1.032	24.1599	15.9751	10.6706
3	Lymph	178.4	1.032	31.2404	22.1849	15.8448
4	Lymph	178.4	1.032	37.4957	27.1292	19.4692
5	Lymph	178.4	1.032	42.2739	32.3383	24.5014
6	Lymph	178.4	1.032	46.525	36.2161	27.6148
7	Lymph	178.4	1.032	49.364	40.0267	31.5978
8	Lymph	178.4	1.032	51.2644	41.6482	33.0458
9	Lymph	178.4	1.032	54.4844	44.6592	35.5998
10	Lymph	178.4	1.032	58.2125	48.0819	38.5946
12	Lymph	178.4	1.032	64.6232	53.9803	43.2358
14	Lymph	178.4	1.032	68.3597	58.5674	47.733
15	Lymph	178.4	1.032	71.2197	61.2731	49.8037
16	Lymph	178.4	1.032	71.7507	62.6841	51.4691
18	Lymph	178.4	1.032	72.6226	64.7103	53.748
20	Lymph	178.4	1.032	73.3112	65.5432	54.8662
1e-09	Muscle	29000	1.05	1.12092	1.25228	0.510591
1e-08	Muscle	29000	1.05	1.20883	1.36298	0.55087
2.5e-08	Muscle	29000	1.05	1.38823	1.57573	0.634952
1e-07	Muscle	29000	1.05	1.80476	2.06862	0.828501
2e-07	Muscle	29000	1.05	2.02404	2.33034	0.929396
5e-07	Muscle	29000	1.05	2.29553	2.65406	1.05249
1e-06	Muscle	29000	1.05	2.43706	2.82259	1.11431
2e-06	Muscle	29000	1.05	2.54269	2.94831	1.1593
5e-06	Muscle	29000	1.05	2.61352	3.0371	1.18474
1e-05	Muscle	29000	1.05	2.62163	3.04732	1.1824
2e-05	Muscle	29000	1.05	2.61051	3.03518	1.17239
5e-05	Muscle	29000	1.05	2.58052	2.99794	1.15099
0.0001	Muscle	29000	1.05	2.54941	2.96127	1.13187
0.0002	Muscle	29000	1.05	2.51635	2.91987	1.11119
0.0005	Muscle	29000	1.05	2.46814	2.86267	1.08393
0.001	Muscle	29000	1.05	2.43394	2.81914	1.06337
0.002	Muscle	29000	1.05	2.40218	2.77948	1.04646
0.005	Muscle	29000	1.05	2.37407	2.74256	1.03309
0.01	Muscle	29000	1.05	2.37748	2.74254	1.03813
0.02	Muscle	29000	1.05	2.43087	2.79564	1.07227
0.03	Muscle	29000	1.05	2.50529	2.87575	1.11759
0.05	Muscle	29000	1.05	2.68345	3.06883	1.22252
0.07	Muscle	29000	1.05	2.8631	3.26737	1.32924
0.1	Muscle	29000	1.05	3.1655	3.60016	1.50221
0.15	Muscle	29000	1.05	3.66653	4.16006	1.78859
0.2	Muscle	29000	1.05	4.19299	4.75012	2.08316
0.3	Muscle	29000	1.05	5.19068	5.87671	2.64584
0.5	Muscle	29000	1.05	7.33514	8.32392	3.82834
0.7	Muscle	29000	1.05	9.24953	10.4551	4.90662
0.9	Muscle	29000	1.05	10.9724	12.3901	5.8811
1	Muscle	29000	1.05	11.0916	12.5817	5.96031
1.2	Muscle	29000	1.05	13.5641	15.2322	7.38506
1.5	Muscle	29000	1.05	16.1373	18.0024	8.8885
2	Muscle	29000	1.05	19.8328	21.9138	11.1551
3	Muscle	29000	1.05	26.1195	28.4364	15.2545
4	Muscle	29000	1.05	31.7092	34.3857	18.5569
5	Muscle	29000	1.05	35.9839	38.5096	22.1552
6	Muscle	29000	1.05	39.6219	42.2829	24.5826
7	Muscle	29000	1.05	42.5774	45.0016	27.5645
8	Muscle	29000	1.05	44.6359	47.0917	28.9748
9	Muscle	29000	1.05	47.5157	50.0957	31.1231
10	Muscle	29000	1.05	50.6887	53.3499	33.4917
12	Muscle	29000	1.05	56.3156	59.1723	37.3424
14	Muscle	29000	1.05	60.0535	62.6926	40.7846
15	Muscle	29000	1.05	62.3953	65.0686	42.3863
16	Muscle	29000	1.05	63.2972	65.7936	43.6703
18	Muscle	29000	1.05	64.5652	66.7365	45.3537
20	Muscle	29000	1.05	64.9728	67.089	45.9525
1e-09	Pancreas	140	1.044	1.08278	0.730817	0.347373
1e-08	Pancreas	140	1.044	1.20253	0.801365	0.375813
2.5e-08	Pancreas	140	1.044	1.40692	0.935865	0.433077
1e-07	Pancreas	140	1.044	1.87389	1.265	0.598238
2e-07	Pancreas	140	1.044	2.15093	1.44291	0.660425
5e-07	Pancreas	140	1.044	2.55225	1.69741	0.811863
1e-06	Pancreas	140	1.044	2.77104	1.84911	0.876445
2e-06	Pancreas	140	1.044	2.94043	1.97491	0.944407
5e-06	Pancreas	140	1.044	3.12691	2.08412	0.987219
1e-05	Pancreas	140	1.044	3.19003	2.14166	1.028
2e-05	Pancreas	140	1.044	3.23843	2.17117	1.04135
5e-05	Pancreas	140	1.044	3.30186	2.19961	1.04859
0.0001	Pancreas	140	1.044	3.31517	2.21429	1.06254
0.0002	Pancreas	140	1.044	3.34765	2.22625	1.07156
0.0005	Pancreas	140	1.044	3.3686	2.24273	1.07662
0.001	Pancreas	140	1.044	3.40507	2.25356	1.06798
0.002	Pancreas	140	1.044	3.40668	2.2614	1.08725
0.005	Pancreas	140	1.044	3.41818	2.2807	1.08721
0.01	Pancreas	140	1.044	3.46787	2.30148	1.09898
0.02	Pancreas	140	1.044	3.50468	2.34054	1.11696
0.03	Pancreas	140	1.044	3.56355	2.38865	1.14424
0.05	Pancreas	140	1.044	3.6941	2.47678	1.18779
0.07	Pancreas	140	1.044	3.75643	2.54017	1.22041
0.1	Pancreas	140	1.044	3.90938	2.64893	1.2878
0.15	Pancreas	140	1.044	4.088	2.80112	1.35583
0.2	Pancreas	140	1.044	4.32619	2.9557	1.43961
0.3	Pancreas	140	1.044	4.67727	3.19571	1.59837
0.5	Pancreas	140	1.044	5.63305	3.79223	1.96725
0.7	Pancreas	140	1.044	6.85285	4.52218	2.4841
0.9	Pancreas	140	1.044	7.91092	5.15116	2.92757
1	Pancreas	140	1.044	7.06008	4.42982	2.50581
1.2	Pancreas	140	1.044	9.91177	6.44396	3.88496
1.5	Pancreas	140	1.044	12.3879	8.22873	5.17012
2	Pancreas	140	1.044	16.3284	11.2588	7.54942
3	Pancreas	140	1.044	23.3811	17.2581	12.4684
4	Pancreas	140	1.044	28.9858	21.7177	15.7915
5	Pancreas	140	1.044	34.5319	27.4874	21.3076
6	Pancreas	140	1.044	38.7806	31.4	24.4789
7	Pancreas	140	1.044	42.6943	35.848	29.1822
8	Pancreas	140	1.044	44.8953	37.8882	31.046
9	Pancreas	140	1.044	47.7175	40.4848	33.1967
10	Pancreas	140	1.044	50.9065	43.7625	36.2414
12	Pancreas	140	1.044	57.0354	49.5747	41.0984
14	Pancreas	140	1.044	61.7889	54.875	46.1847
15	Pancreas	140	1.044	64.3585	57.5251	48.4921
16	Pancreas	140	1.044	65.6228	59.3216	50.5593
18	Pancreas	140	1.044	67.7905	62.4136	53.8046
20	Pancreas	140	1.044	68.4392	63.5166	55.1623
1e-09	prostate	17	1.031	1.15427	1.04456	0.228777
1e-08	prostate	17	1.031	1.29042	1.15495	0.22684
2.5e-08	prostate	17	1.031	1.49565	1.33033	0.269588
1e-07	prostate	17	1.031	2.00817	1.74395	0.355634
2e-07	prostate	17	1.031	2.30696	1.99906	0.426461
5e-07	prostate	17	1.031	2.70463	2.35803	0.475932
1e-06	prostate	17	1.031	2.9365	2.55587	0.504828
2e-06	prostate	17	1.031	3.16991	2.73357	0.517436
5e-06	prostate	17	1.031	3.34653	2.87082	0.566748
1e-05	prostate	17	1.031	3.39096	2.93788	0.579193
2e-05	prostate	17	1.031	3.4273	3.00927	0.56869
5e-05	prostate	17	1.031	3.52572	3.02481	0.584963
0.0001	prostate	17	1.031	3.54864	3.05539	0.586984
0.0002	prostate	17	1.031	3.58025	3.07202	0.583658
0.0005	prostate	17	1.031	3.56808	3.09283	0.581215
0.001	prostate	17	1.031	3.61398	3.08521	0.588888
0.002	prostate	17	1.031	3.55797	3.09286	0.586373
0.005	prostate	17	1.031	3.64547	3.09139	0.585214
0.01	prostate	17	1.031	3.62767	3.13171	0.580711
0.02	prostate	17	1.031	3.65223	3.16378	0.599058
0.03	prostate	17	1.031	3.73287	3.20049	0.614708
0.05	prostate	17	1.031	3.85375	3.33361	0.631327
0.07	prostate	17	1.031	3.9321	3.40517	0.67109
0.1	prostate	17	1.031	4.09586	3.54602	0.665928
0.15	prostate	17	1.031	4.31115	3.75701	0.732202
0.2	prostate	17	1.031	4.53462	4.0039	0.778712
0.3	prostate	17	1.031	5.04689	4.45966	0.844399
0.5	prostate	17	1.031	6.19264	5.74906	0.98862
0.7	prostate	17	1.031	7.75747	7.33527	1.20062
0.9	prostate	17	1.031	9.17809	8.72287	1.35541
1	prostate	17	1.031	8.1792	7.94921	1.16139
1.2	prostate	17	1.031	11.5698	11.3298	1.74689
1.5	prostate	17	1.031	14.4594	14.2491	2.38044
2	prostate	17	1.031	18.8209	18.795	3.70007
3	prostate	17	1.031	26.3563	26.8684	6.90527
4	prostate	17	1.031	32.659	33.156	8.90312
5	prostate	17	1.031	37.628	39.0292	13.2957
6	prostate	17	1.031	42.3317	43.8628	15.8495
7	prostate	17	1.031	45.8908	47.6618	20.2685
8	prostate	17	1.031	47.9901	50.1112	21.0277
9	prostate	17	1.031	51.05	53.3451	23.4295
10	prostate	17	1.031	54.319	57.0187	25.7353
12	prostate	17	1.031	60.3062	63.8688	29.2402
14	prostate	17	1.031	65.0221	68.6892	33.9059
15	prostate	17	1.031	68.0872	71.7007	36.0093
16	prostate	17	1.031	68.6009	72.8041	37.5865
18	prostate	17	1.031	70.3242	75.2012	40.9377
20	prostate	17	1.031	71.2074	76.0665	42.6063
1e-09	Intestine	650	1.037	1.38704	0.717754	0.468904
1e-08	Intestine	650	1.037	1.52321	0.786365	0.514244
2.5e-08	Intestine	650	1.037	1.80217	0.913703	0.593639
1e-07	Intestine	650	1.037	2.43969	1.22724	0.811477
2e-07	Intestine	650	1.037	2.8353	1.40332	0.940725
5e-07	Intestine	650	1.037	3.26087	1.64761	1.10756
1e-06	Intestine	650	1.037	3.55855	1.79156	1.17696
2e-06	Intestine	650	1.037	3.78671	1.91272	1.27941
5e-06	Intestine	650	1.037	3.95308	2.02023	1.36741
1e-05	Intestine	650	1.037	4.01011	2.0581	1.36637
2e-05	Intestine	650	1.037	4.06566	2.08618	1.38655
5e-05	Intestine	650	1.037	4.10278	2.11469	1.42573
0.0001	Intestine	650	1.037	4.11299	2.12987	1.43073
0.0002	Intestine	650	1.037	4.07883	2.14098	1.41158
0.0005	Intestine	650	1.037	4.05164	2.14952	1.42106
0.001	Intestine	650	1.037	4.05556	2.16116	1.43217
0.002	Intestine	650	1.037	4.03643	2.16064	1.38964
0.005	Intestine	650	1.037	4.00483	2.17719	1.41684
0.01	Intestine	650	1.037	3.98964	2.19388	1.40653
0.02	Intestine	650	1.037	4.06781	2.22293	1.41889
0.03	Intestine	650	1.037	4.08171	2.26808	1.43853
0.05	Intestine	650	1.037	4.25373	2.34868	1.46889
0.07	Intestine	650	1.037	4.36237	2.40373	1.53265
0.1	Intestine	650	1.037	4.59541	2.50136	1.59965
0.15	Intestine	650	1.037	4.92548	2.64288	1.71561
0.2	Intestine	650	1.037	5.38316	2.7885	1.86094
0.3	Intestine	650	1.037	6.15127	3.01814	2.13538
0.5	Intestine	650	1.037	8.17585	3.61645	2.88207
0.7	Intestine	650	1.037	10.2189	4.36762	3.79304
0.9	Intestine	650	1.037	12.0999	5.02076	4.69182
1	Intestine	650	1.037	11.8155	4.41347	4.15267
1.2	Intestine	650	1.037	14.9552	6.36829	6.10688
1.5	Intestine	650	1.037	18.167	8.04685	7.8974
2	Intestine	650	1.037	22.4674	11.058	10.4689
3	Intestine	650	1.037	29.8741	16.8865	15.9552
4	Intestine	650	1.037	36.3159	21.2426	19.8638
5	Intestine	650	1.037	40.9623	26.9156	24.9378
6	Intestine	650	1.037	45.2149	30.5851	28.0532
7	Intestine	650	1.037	47.8341	35.0495	32.1161
8	Intestine	650	1.037	50.5497	36.9233	34.1819
9	Intestine	650	1.037	53.6727	39.4205	36.5417
10	Intestine	650	1.037	57.4989	42.7486	39.6879
12	Intestine	650	1.037	64.0337	48.4627	44.1964
14	Intestine	650	1.037	67.2738	53.6362	49.0913
15	Intestine	650	1.037	70.5411	56.0849	51.028
16	Intestine	650	1.037	70.9148	57.9836	53.4164
18	Intestine	650	1.037	72.0645	60.8294	56.0089
20	Intestine	650	1.037	72.3403	61.8573	57.2007
1e-09	Spleen	150	1.06	0.933256	1.46872	0.769298
1e-08	Spleen	150	1.06	0.985676	1.62234	0.853797
2.5e-08	Spleen	150	1.06	1.10888	1.88575	0.988266
1e-07	Spleen	150	1.06	1.39486	2.5212	1.29874
2e-07	Spleen	150	1.06	1.55561	2.88444	1.47485
5e-07	Spleen	150	1.06	1.7668	3.37218	1.71267
1e-06	Spleen	150	1.06	1.88981	3.65109	1.86264
2e-06	Spleen	150	1.06	1.9885	3.88437	1.96879
5e-06	Spleen	150	1.06	2.09219	4.09135	2.0767
1e-05	Spleen	150	1.06	2.12192	4.16338	2.10325
2e-05	Spleen	150	1.06	2.15929	4.20629	2.11821
5e-05	Spleen	150	1.06	2.17787	4.24273	2.13022
0.0001	Spleen	150	1.06	2.19608	4.24584	2.14048
0.0002	Spleen	150	1.06	2.20722	4.23709	2.13102
0.0005	Spleen	150	1.06	2.20682	4.21742	2.11978
0.001	Spleen	150	1.06	2.2269	4.20153	2.12124
0.002	Spleen	150	1.06	2.21473	4.18287	2.09755
0.005	Spleen	150	1.06	2.22498	4.1526	2.09419
0.01	Spleen	150	1.06	2.23771	4.1485	2.1017
0.02	Spleen	150	1.06	2.2576	4.15652	2.10815
0.03	Spleen	150	1.06	2.27908	4.21187	2.12736
0.05	Spleen	150	1.06	2.328	4.3017	2.18491
0.07	Spleen	150	1.06	2.36888	4.39174	2.2538
0.1	Spleen	150	1.06	2.44025	4.56534	2.33781
0.15	Spleen	150	1.06	2.54204	4.86	2.47368
0.2	Spleen	150	1.06	2.64695	5.21775	2.66871
0.3	Spleen	150	1.06	2.82823	5.93957	2.99513
0.5	Spleen	150	1.06	3.30389	7.93857	3.8451
0.7	Spleen	150	1.06	3.88561	9.98332	4.79631
0.9	Spleen	150	1.06	4.42957	11.813	5.66779
1	Spleen	150	1.06	4.03723	11.1986	5.27632
1.2	Spleen	150	1.06	5.42743	14.8012	7.14869
1.5	Spleen	150	1.06	6.84113	17.9774	8.99367
2	Spleen	150	1.06	9.25209	22.483	11.8706
3	Spleen	150	1.06	14.1559	29.8675	17.2368
4	Spleen	150	1.06	17.7975	36.4391	21.2674
5	Spleen	150	1.06	22.8132	40.9399	26.1851
6	Spleen	150	1.06	26.3136	45.3499	29.3833
7	Spleen	150	1.06	30.41	48.2667	33.2129
8	Spleen	150	1.06	31.7682	50.3016	34.8429
9	Spleen	150	1.06	34.6252	53.4781	37.2368
10	Spleen	150	1.06	37.4768	56.9336	40.1328
12	Spleen	150	1.06	42.5368	63.505	44.9302
14	Spleen	150	1.06	47.4657	67.3969	49.0367
15	Spleen	150	1.06	49.6222	70.1655	51.0258
16	Spleen	150	1.06	51.3358	70.941	52.5409
18	Spleen	150	1.06	54.1283	71.9849	54.3802
20	Spleen	150	1.06	55.2198	72.2921	55.0952
1e-09	Thymus	25	1.031	1.91666	0.591523	0.38321
1e-08	Thymus	25	1.031	2.1451	0.647682	0.380319
2.5e-08	Thymus	25	1.031	2.54629	0.755856	0.433688
1e-07	Thymus	25	1.031	3.47111	1.02458	0.574149
2e-07	Thymus	25	1.031	3.9208	1.17841	0.633507
5e-07	Thymus	25	1.031	4.51848	1.38807	0.748162
1e-06	Thymus	25	1.031	4.81228	1.51242	0.796289
2e-06	Thymus	25	1.031	4.99409	1.6017	0.853265
5e-06	Thymus	25	1.031	5.12182	1.72249	0.894406
1e-05	Thymus	25	1.031	5.16201	1.75386	0.893545
2e-05	Thymus	25	1.031	5.07639	1.77337	0.928679
5e-05	Thymus	25	1.031	4.99984	1.8128	0.938781
0.0001	Thymus	25	1.031	4.88495	1.81278	0.914733
0.0002	Thymus	25	1.031	4.74501	1.8381	0.930242
0.0005	Thymus	25	1.031	4.68234	1.85558	0.917624
0.001	Thymus	25	1.031	4.54887	1.82878	0.904323
0.002	Thymus	25	1.031	4.42747	1.84206	0.921291
0.005	Thymus	25	1.031	4.36906	1.85143	0.917688
0.01	Thymus	25	1.031	4.33577	1.88496	0.896776
0.02	Thymus	25	1.031	4.40232	1.90474	0.910864
0.03	Thymus	25	1.031	4.5874	1.94428	0.93059
0.05	Thymus	25	1.031	4.84705	1.99952	0.935393
0.07	Thymus	25	1.031	5.24499	2.05912	0.962615
0.1	Thymus	25	1.031	5.79961	2.13834	0.989482
0.15	Thymus	25	1.031	6.862	2.24227	1.05905
0.2	Thymus	25	1.031	8.05586	2.3433	1.08182
0.3	Thymus	25	1.031	10.2539	2.50601	1.17826
0.5	Thymus	25	1.031	14.706	2.96952	1.46097
0.7	Thymus	25	1.031	18.1548	3.59145	1.79546
0.9	Thymus	25	1.031	21.3233	4.16517	2.12301
1	Thymus	25	1.031	22.3767	3.6199	1.95943
1.2	Thymus	25	1.031	25.4821	5.34377	2.69455
1.5	Thymus	25	1.031	29.3099	6.99206	3.53982
2	Thymus	25	1.031	34.044	9.84907	5.05011
3	Thymus	25	1.031	41.4926	15.5274	8.36652
4	Thymus	25	1.031	49.7354	19.7571	10.7088
5	Thymus	25	1.031	52.4342	24.9626	14.5795
6	Thymus	25	1.031	57.0457	28.6619	16.9007
7	Thymus	25	1.031	58.2526	32.8723	20.5931
8	Thymus	25	1.031	60.9015	34.4534	21.5052
9	Thymus	25	1.031	64.6019	37.2338	23.8508
10	Thymus	25	1.031	67.6149	40.0847	25.7137
12	Thymus	25	1.031	74.5786	45.343	29.2852
14	Thymus	25	1.031	76.6323	50.0479	33.0952
15	Thymus	25	1.031	78.9264	52.3552	34.5206
16	Thymus	25	1.031	78.9332	53.8471	36.0197
18	Thymus	25	1.031	78.9174	56.8894	38.5448
20	Thymus	25	1.031	79.5023	57.6188	39.4311
1e-09	Eye	0.039	1.06	3.16715	0.192648	0.938933
1e-08	Eye	0.039	1.06	3.31128	0.209403	0.938658
2.5e-08	Eye	0.039	1.06	3.215	0.198276	1.54262
1e-07	Eye	0.039	1.06	2.68782	0.324676	1.51828
2e-07	Eye	0.039	1.06	2.54331	0.335184	1.47781
5e-07	Eye	0.039	1.06	2.87436	0.36719	1.5194
1e-06	Eye	0.039	1.06	3.17588	0.422241	1.38044
2e-06	Eye	0.039	1.06	2.85175	0.442657	1.36616
5e-06	Eye	0.039	1.06	2.30097	0.49092	1.4237
1e-05	Eye	0.039	1.06	2.73736	0.475313	1.79968
2e-05	Eye	0.039	1.06	2.60955	0.448705	1.69165
5e-05	Eye	0.039	1.06	2.30185	0.440066	1.30839
0.0001	Eye	0.039	1.06	2.2019	0.48377	1.43309
0.0002	Eye	0.039	1.06	2.13142	0.512915	1.54281
0.0005	Eye	0.039	1.06	1.95621	0.490653	1.38523
0.001	Eye	0.039	1.06	1.61628	0.445092	1.44799
0.002	Eye	0.039	1.06	1.87219	0.447569	1.50889
0.005	Eye	0.039	1.06	2.09509	0.420899	1.21457
0.01	Eye	0.039	1.06	2.27551	0.401418	1.44981
0.02	Eye	0.039	1.06	2.91005	0.453163	1.66221
0.03	Eye	0.039	1.06	4.06384	0.459159	1.88587
0.05	Eye	0.039	1.06	5.28292	0.510454	2.43466
0.07	Eye	0.039	1.06	6.40946	0.414522	3.02721
0.1	Eye	0.039	1.06	7.69059	0.47141	3.57533
0.15	Eye	0.039	1.06	9.95291	0.502621	5.11358
0.2	Eye	0.039	1.06	11.913	0.489226	5.53271
0.3	Eye	0.039	1.06	14.7586	0.588508	7.58775
0.5	Eye	0.039	1.06	19.088	0.674678	10.7364
0.7	Eye	0.039	1.06	21.7324	0.701295	12.7894
0.9	Eye	0.039	1.06	26.32	0.844167	14.9971
1	Eye	0.039	1.06	31.2691	0.731987	16.6193
1.2	Eye	0.039	1.06	28.942	1.14145	18.8151
1.5	Eye	0.039	1.06	30.7543	1.52282	20.7486
2	Eye	0.039	1.06	33.4327	2.52009	22.9821
3	Eye	0.039	1.06	39.8145	4.90469	32.6618
4	Eye	0.039	1.06	48.271	6.68188	34.942
5	Eye	0.039	1.06	54.4062	9.54886	39.2283
6	Eye	0.039	1.06	53.2314	11.1058	41.4391
7	Eye	0.039	1.06	51.8116	15.5743	45.8275
8	Eye	0.039	1.06	56.586	15.5466	49.8014
9	Eye	0.039	1.06	60.9103	17.8534	51.0393
10	Eye	0.039	1.06	64.8474	19.3743	55.4396
12	Eye	0.039	1.06	72.0431	21.6363	62.4476
14	Eye	0.039	1.06	76.246	25.0162	60.5817
15	Eye	0.039	1.06	72.6333	26.4536	65.8844
16	Eye	0.039	1.06	79.88	29.1374	69.5249
18	Eye	0.039	1.06	71.2492	31.469	65.8868
20	Eye	0.039	1.06	73.5687	32.1481	63.5922
1e-09	RBM	900	0.98	1.04278	1.17817	0.415665		ICRP-female-mesh-data
1e-08	RBM	900	0.98	1.14005	1.31124	0.448367
2.5e-08	RBM	900	0.98	1.32295	1.53963	0.518947
1e-07	RBM	900	0.98	1.74412	2.07481	0.685698
2e-07	RBM	900	0.98	1.97349	2.38149	0.776015
5e-07	RBM	900	0.98	2.28056	2.78283	0.894364
1e-06	RBM	900	0.98	2.45155	3.00167	0.958368
2e-06	RBM	900	0.98	2.58823	3.17424	1.01259
5e-06	RBM	900	0.98	2.70014	3.31512	1.05179
1e-05	RBM	900	0.98	2.73312	3.36363	1.05993
2e-05	RBM	900	0.98	2.75586	3.38246	1.06686
5e-05	RBM	900	0.98	2.76332	3.38405	1.06075
0.0001	RBM	900	0.98	2.76173	3.3721	1.05815
0.0002	RBM	900	0.98	2.75481	3.3549	1.05053
0.0005	RBM	900	0.98	2.73916	3.33161	1.03914
0.001	RBM	900	0.98	2.73464	3.308	1.03262
0.002	RBM	900	0.98	2.72144	3.28529	1.0252
0.005	RBM	900	0.98	2.71261	3.26271	1.01953
0.01	RBM	900	0.98	2.72027	3.26176	1.02217
0.02	RBM	900	0.98	2.76167	3.29503	1.04067
0.03	RBM	900	0.98	2.81479	3.34817	1.06614
0.05	RBM	900	0.98	2.94005	3.4774	1.12428
0.07	RBM	900	0.98	3.05195	3.59967	1.17734
0.1	RBM	900	0.98	3.24252	3.82731	1.27042
0.15	RBM	900	0.98	3.55065	4.19765	1.4183
0.2	RBM	900	0.98	3.88094	4.61231	1.57439
0.3	RBM	900	0.98	4.49487	5.40363	1.86297
0.5	RBM	900	0.98	5.89947	7.29082	2.5115
0.7	RBM	900	0.98	7.32049	9.09364	3.18501
0.9	RBM	900	0.98	8.59742	10.7161	3.80017
1	RBM	900	0.98	8.30342	10.4957	3.68833
1.2	RBM	900	0.98	10.6644	13.2522	4.83112
1.5	RBM	900	0.98	12.9455	15.9009	6.01156
2	RBM	900	0.98	16.3864	19.7428	7.96341
3	RBM	900	0.98	22.5612	26.2748	11.8816
4	RBM	900	0.98	27.9479	32.2382	14.7912
5	RBM	900	0.98	32.1222	36.1307	18.661
6	RBM	900	0.98	35.6432	39.8013	21.1327
7	RBM	900	0.98	38.6766	42.4843	24.4377
8	RBM	900	0.98	41.324	45.2072	25.924
9	RBM	900	0.98	43.6544	47.552	27.9722
10	RBM	900	0.98	46.1477	50.1894	30.1394
12	RBM	900	0.98	51.3073	55.5408	33.7065
14	RBM	900	0.98	54.9011	58.8392	37.3464
15	RBM	900	0.98	56.6652	60.7179	38.6982
16	RBM	900	0.98	57.6537	61.5471	40.0381
18	RBM	900	0.98	59.5469	62.9196	42.3378
20	RBM	900	0.98	60.0509	63.2549	43.1297
1e-09	colon	360	1.04	1.53641	0.788099	0.352922
1e-08	colon	360	1.04	1.68137	0.855451	0.385349
2.5e-08	colon	360	1.04	2.00934	0.99281	0.446282
1e-07	colon	360	1.04	2.73129	1.31775	0.596606
2e-07	colon	360	1.04	3.18315	1.51067	0.691958
5e-07	colon	360	1.04	3.68018	1.77395	0.81259
1e-06	colon	360	1.04	3.97973	1.92287	0.870125
2e-06	colon	360	1.04	4.1643	2.03988	0.931062
5e-06	colon	360	1.04	4.36002	2.14694	0.990912
1e-05	colon	360	1.04	4.40252	2.19492	1.00186
2e-05	colon	360	1.04	4.43556	2.22234	1.01616
5e-05	colon	360	1.04	4.42743	2.25926	1.01713
0.0001	colon	360	1.04	4.40712	2.25112	1.01137
0.0002	colon	360	1.04	4.38612	2.27947	1.00638
0.0005	colon	360	1.04	4.37121	2.26488	1.01405
0.001	colon	360	1.04	4.30809	2.28532	1.0005
0.002	colon	360	1.04	4.28311	2.29386	0.992776
0.005	colon	360	1.04	4.22457	2.29336	0.988746
0.01	colon	360	1.04	4.21589	2.29475	1.00701
0.02	colon	360	1.04	4.16674	2.33473	1.01319
0.03	colon	360	1.04	4.30324	2.37599	0.995166
0.05	colon	360	1.04	4.44079	2.43972	1.04976
0.07	colon	360	1.04	4.56832	2.48107	1.08454
0.1	colon	360	1.04	4.83594	2.60543	1.12937
0.15	colon	360	1.04	5.41033	2.7629	1.22137
0.2	colon	360	1.04	5.95002	2.92431	1.362
0.3	colon	360	1.04	7.22542	3.1965	1.5556
0.5	colon	360	1.04	9.94288	3.95805	2.17181
0.7	colon	360	1.04	12.32	4.7858	2.79847
0.9	colon	360	1.04	14.5631	5.62162	3.45487
1	colon	360	1.04	14.6241	5.24679	3.25845
1.2	colon	360	1.04	18.0875	7.24264	4.66304
1.5	colon	360	1.04	21.4862	8.99977	5.92522
2	colon	360	1.04	25.7345	11.8827	8.09961
3	colon	360	1.04	33.0458	18.0817	12.554
4	colon	360	1.04	39.6345	22.6397	15.4771
5	colon	360	1.04	44.6605	27.8615	20.156
6	colon	360	1.04	48.9789	32.1187	22.8842
7	colon	360	1.04	51.6149	35.3432	27.3039
8	colon	360	1.04	53.2235	37.5871	28.3843
9	colon	360	1.04	56.6566	39.6074	30.9327
10	colon	360	1.04	60.2451	43.8954	33.6699
12	colon	360	1.04	66.6061	49.771	37.9775
14	colon	360	1.04	70.0181	53.6364	41.9797
15	colon	360	1.04	73.2187	56.6336	43.8893
16	colon	360	1.04	73.9454	58.186	45.878
18	colon	360	1.04	73.937	60.5484	48.0382
20	colon	360	1.04	74.8369	61.7237	49.5267
1e-09	Lung	420	0.413	1.17552	1.09356	0.411096
1e-08	Lung	420	0.413	1.2191	1.26505	0.423672
2.5e-08	Lung	420	0.413	1.48576	1.48632	0.519794
1e-07	Lung	420	0.413	1.92302	2.00882	0.611253
2e-07	Lung	420	0.413	2.20564	2.28532	0.745749
5e-07	Lung	420	0.413	2.55226	2.59713	0.823475
1e-06	Lung	420	0.413	2.71358	2.79724	0.892522
2e-06	Lung	420	0.413	2.97159	3.0323	0.913305
5e-06	Lung	420	0.413	3.07359	3.16625	0.943581
1e-05	Lung	420	0.413	3.05753	3.3914	0.940161
2e-05	Lung	420	0.413	3.09399	3.38441	0.988452
5e-05	Lung	420	0.413	3.14286	3.30807	1.0166
0.0001	Lung	420	0.413	3.20381	3.32245	1.07118
0.0002	Lung	420	0.413	3.05022	3.39634	1.00367
0.0005	Lung	420	0.413	3.0689	3.33779	1.0123
0.001	Lung	420	0.413	3.14579	3.32876	1.03194
0.002	Lung	420	0.413	3.10258	3.25353	0.984465
0.005	Lung	420	0.413	3.07241	3.33575	0.999609
0.01	Lung	420	0.413	3.07718	3.23918	0.997976
0.02	Lung	420	0.413	3.06567	3.1371	0.993802
0.03	Lung	420	0.413	3.13452	3.25934	0.958686
0.05	Lung	420	0.413	3.22254	3.36971	1.03328
0.07	Lung	420	0.413	3.13505	3.38493	1.08836
0.1	Lung	420	0.413	3.46633	3.66877	1.08488
0.15	Lung	420	0.413	3.71358	3.8419	1.18219
0.2	Lung	420	0.413	3.93313	4.35812	1.25397
0.3	Lung	420	0.413	4.61973	4.97141	1.43874
0.5	Lung	420	0.413	6.13491	7.12656	2.06688
0.7	Lung	420	0.413	7.88917	8.86921	2.65834
[truncated: 3,618 more rows]
